# Supplementary material
Source: Research Square preprint supplement (doi:10.21203/rs.3.rs-8960775/v1)
Supplement: Supplementary file 1 [file 111af08b673aa05ff8e1158e.xlsx]

## Sheet: Sheet 1
EntrezGeneID	Delta	EntrezGeneSymbol	UniProt
1993	1.39427	ELAVL2	Q12926
1740	1.35833	DLG2	Q15700
5534	1.33625	PPP3R1	P63098
11075	1.31481	STMN2	Q93045
5153	1.30413	PDE1B	Q01064
2596	1.26319	GAP43	P17677
4900	1.25802	NRGN	Q92686
3925	1.24594	STMN1	P16949
9201	1.23875	DCLK1	O15075
83699	1.22159	SH3BGRL2	Q9UJC5
9141	1.21216	PDCD5	O14737
7533	1.20647	YWHAH	Q04917
10409	1.1948	BASP1	P80723
29766	1.1903	TMOD3	Q9NYL9
84557	1.18625	MAP1LC3A	Q9H492
7178	1.18242	TPT1	P13693
23236	1.17973	PLCB1	Q9NQ66
55968	1.16841	NSFL1C	Q9UNZ2
50861	1.16375	STMN3	Q9NZ72
57154	1.15963	SMURF1	Q9HCE7
55684	1.15918	RABL6	Q3YEC7
3251	1.15857	HPRT1	P00492
27183	1.1484	VPS4A	Q9UN37
79017	1.1405	GGCT	O75223
10935	1.13632	PRDX3	P30048
5037	1.13534	PEBP1	P30086
5502	1.13262	PPP1R1A	Q13522
7296	1.12829	TXNRD1	Q16881
85012	1.12108	TCEAL3	Q969E4
8447	1.11554	DOC2B	Q14184
6612	1.10935	SUMO3	P55854
1399	1.10568	CRKL	P46109
7917	1.10394	BAG6	P46379
273	1.10253	AMPH	P49418
79180	1.09757	EFHD2	Q96C19
9456	1.09279	HOMER1	Q86YM7
1398	1.09259	CRK	P46108
23576	1.09143	DDAH1	O94760
8266	1.09119	UBL4A	P11441
7447	1.09097	VSNL1	P62760
7334	1.0718	UBE2N	P61088
6861	1.07018	SYT5	O00445
8417	1.06997	STX7	O15400
57559	1.06619	STAMBPL1	Q96FJ0
23286	1.06187	WWC1	Q8IX03
84264	1.06122	HAGHL	Q6PII5
388962	1.05944	BOLA3	Q53S33
9863	1.05585	MAGI2	Q86UL8
2272	1.0494	FHIT	P49789
9685	1.04608	CLINT1	Q14677
10490	1.04341	VTI1B	Q9UEU0
65264	1.03602	UBE2Z	Q9H832
23710	1.03557	GABARAPL1	Q9H0R8
2936	1.03305	GSR	P00390
2739	1.03266	GLO1	Q04760
2617	1.0322	GARS1	P41250
5582	1.02649	PRKCG	P05129
4199	1.02436	ME1	P48163
85479	1.01904	DNAJC5B	Q9UF47
29114	1.01566	TAGLN3	Q9UI15
51506	1.01392	UFC1	Q9Y3C8
51719	1.01154	CAB39	Q9Y376
84525	1.01112	HOPX	Q9BPY8
3300	1.00473	DNAJB2	P25686
7336	1.00371	UBE2V2	Q15819
23197	1.0024	FAF2	Q96CS3
51015	1.00113	ISOC1	Q96CN7
5887	0.991392	RAD23B	P54727
81631	0.990559	MAP1LC3B	Q9GZQ8
6767	0.988692	ST13	P50502
56893	0.984029	UBQLN4	Q9NRR5
8498	0.982703	RANBP3	Q9H6Z4
4190	0.981875	MDH1	P40925
92675	0.97915	DTD1	Q8TEA8
29978	0.978138	UBQLN2	Q9UHD9
51110	0.974978	LACTB2	Q53H82
5886	0.97465	RAD23A	P54725
89853	0.973178	MVB12B	Q9H7P6
5894	0.967915	RAF1	P04049
226	0.963734	ALDOA	P04075
23224	0.959813	SYNE2	Q8WXH0
3241	0.95637	HPCAL1	P37235
7345	0.953527	UCHL1	P09936
2752	0.94894	GLUL	P15104
2937	0.943882	GSS	P48637
165721	0.942317	DNAJB8	Q8NHS0
10814	0.94176	CPLX2	Q6PUV4
4973	0.93871	OLR1	P78380
2550	0.938225	GABBR1	Q9UBS5
1155	0.937482	TBCB	Q99426
65108	0.936526	MARCKSL1	P49006
1975	0.933336	EIF4B	P23588
27101	0.932881	CACYBP	Q9HB71
11344	0.931568	TWF2	Q6IBS0
9377	0.916111	COX5A	P20674
51517	0.915368	NCKIPSD	Q9NZQ3
9559	0.915122	VPS26A	O75436
5573	0.90291	PRKAR1A	P10644
51571	0.901715	CYRIB	Q9NUQ9
51024	0.899441	FIS1	Q9Y3D6
29924	0.899007	EPN1	Q9Y6I3
8825	0.898021	LIN7A	O14910
55847	0.897817	CISD1	Q9NZ45
3093	0.897155	UBE2K	P61086
6857	0.89702	SYT1	P21579
1982	0.892027	EIF4G2	P78344
3326	0.890689	HSP90AB1	P08238
5575	0.889157	PRKAR1B	P31321
2665	0.88812	GDI2	P50395
30845	0.882417	EHD3	Q9NZN3
11345	0.880902	GABARAPL2	P60520
6453	0.880278	ITSN1	Q15811
283871	0.87855	PGP	A6NDG6
6415	0.877007	SELENOW	P63302
10910	0.873596	SUGT1	Q9Y2Z0
26088	0.872836	GGA1	Q9UJY5
10418	0.871318	SPON1	Q9HCB6
9653	0.870091	HS2ST1	Q7LGA3
51619	0.866495	UBE2D4	Q9Y2X8
161	0.86608	AP2A2	O94973
54936	0.862976	ADPRS	Q9NX46
8522	0.862263	GAS7	O60861
2671	0.861971	GFER	P55789
5306	0.858241	PITPNA	Q00169
7511	0.858141	XPNPEP1	Q9NQW7
3320	0.851547	HSP90AA1	P07900
23019	0.842944	CNOT1	A5YKK6
5579	0.841052	PRKCB	P05771
152137	0.840717	CCDC50	Q8IVM0
25927	0.839733	CNRIP1	Q96F85
10815	0.836725	CPLX1	O14810
6809	0.835585	STX3	Q13277
23112	0.833963	TNRC6B	Q9UPQ9
5147	0.832814	PDE6D	O43924
79719	0.82965	AAGAB	Q6PD74
57026	0.825066	PDXP	Q96GD0
10971	0.825006	YWHAQ	P27348
10000	0.822759	AKT3	Q9Y243
9218	0.822148	VAPA	Q9P0L0
25996	0.822119	REXO2	Q9Y3B8
6623	0.819613	SNCG	O76070
29968	0.818107	PSAT1	Q9Y617
112476	0.815752	PRRT2	Q7Z6L0
9482	0.815517	STX8	Q9UNK0
9125	0.81188	CNOT9	Q92600
9615	0.809827	GDA	Q9Y2T3
60496	0.808682	AASDHPPT	Q9NRN7
2054	0.804402	STX2	P32856
2764	0.797243	GMFB	P60983
56998	0.796469	CTNNBIP1	Q9NSA3
3422	0.795855	IDI1	Q13907
4287	0.792742	ATXN3	P54252
7329	0.789057	UBE2I	P63279
9761	0.787488	MLEC	Q14165
145553	0.784595	MDP1	Q86V88
50613	0.783424	UBQLN3	Q9H347
5962	0.783403	RDX	P35241
5329	0.7832	PLAUR	Q03405
54472	0.78265	TOLLIP	Q9H0E2
9900	0.781337	SV2A	Q7L0J3
9019	0.780189	MPZL1	O95297
2042	0.780185	EPHA3	P29320
84364	0.777842	ARFGAP2	Q8N6H7
5495	0.774493	PPM1B	O75688
25796	0.772258	PGLS	O95336
2806	0.768909	GOT2	P00505
56890	0.768257	MDM1	Q8TC05
26025	0.765448	PCDHGA12	O60330
5478	0.762429	PPIA	P62937
389941	0.761144	C1QL3	Q5VWW1
51287	0.758945	COA4	Q9NYJ1
4191	0.757549	MDH2	P40926
55832	0.75738	CAND1	Q86VP6
8880	0.756112	FUBP1	Q96AE4
1759	0.751336	DNM1	Q05193
1854	0.747524	DUT	P33316
51232	0.74725	CRIM1	Q9NZV1
6327	0.746473	SCN2B	O60939
140735	0.740472	DYNLL2	Q96FJ2
23673	0.739198	STX12	Q86Y82
10988	0.739036	METAP2	P50579
51466	0.738745	EVL	Q9UI08
5224	0.737703	PGAM2	P15259
113675	0.736289	SDSL	Q96GA7
54957	0.734245	TXNL4B	Q9NX01
6233	0.73382	RPS27A	P62979
5577	0.73322	PRKAR2B	P31323
29934	0.731212	SNX12	Q9UMY4
6804	0.722721	STX1A	Q16623
1992	0.720241	SERPINB1	P30740
5550	0.717491	PREP	P48147
654790	0.71552	PCP4L1	A6NKN8
55997	0.715092	CFC1	P0CG37
7086	0.713162	TKT	P29401
81621	0.712989	KAZALD1	Q96I82
2885	0.711151	GRB2	P62993
8887	0.709747	TAX1BP1	Q86VP1
23584	0.708715	VSIG2	Q96IQ7
143187	0.708611	VTI1A	Q96AJ9
23111	0.705219	SPART	Q8N0X7
98	0.70367	ACYP2	P14621
7251	0.7035	TSG101	Q99816
51569	0.703176	UFM1	P61960
3551	0.700326	IKBKB	O14920
8707	0.699241	B3GALT2	O43825
54873	0.695661	PALMD	Q9NP74
7458	0.6952	EIF4H	Q15056
100272147	0.694785	CMC4	P56277
11164	0.694758	NUDT5	Q9UKK9
10068	0.693322	IL18BP	O95998
83988	0.69087	NCALD	P61601
2321	0.687616	FLT1	P17948
54997	0.686333	TESC	Q96BS2
23543	0.682926	RBFOX2	O43251
5690	0.681751	PSMB2	P49721
8792	0.679011	TNFRSF11A	Q9Y6Q6
163	0.677969	AP2B1	P63010
8321	0.676514	FZD1	Q9UP38
11261	0.674192	CHP1	Q99653
51022	0.674058	GLRX2	Q9NS18
57611	0.673189	ISLR2	Q6UXK2
976	0.671697	ADGRE5	P48960
9908	0.668916	G3BP2	Q9UN86
51172	0.668912	NAGPA	Q9UK23
128240	0.668353	NAXE	Q8NCW5
5692	0.667818	PSMB4	P28070
11275	0.667557	KLHL2	O95198
55752	0.667149	SEPTIN11	Q9NVA2
27020	0.666886	NPTN	Q9Y639
25817	0.666575	TAFA5	Q7Z5A7
23386	0.665358	NUDCD3	Q8IVD9
10228	0.662089	STX6	O43752
29094	0.661468	LGALSL	Q3ZCW2
4916	0.659692	NTRK3	Q16288
402117	0.658822	VWC2L	B2RUY7
1010	0.657789	CDH12	P55289
5589	0.656071	PRKCSH	P14314
1785	0.654913	DNM2	P50570
694	0.654824	BTG1	P62324
78999	0.654524	LRFN4	Q6PJG9
3480	0.652881	IGF1R	P08069
944	0.650093	TNFSF8	P32971
10243	0.649818	GPHN	Q9NQX3
2644	0.649553	GCHFR	P30047
10380	0.649257	BPNT1	O95861
576	0.649072	ADGRB2	O60241
7167	0.648099	TPI1	P60174
5789	0.647665	PTPRD	P23468
29967	0.646665	LRP12	Q9Y561
221914	0.644587	GPC2	Q8N158
81562	0.643048	LMAN2L	Q9H0V9
55740	0.643031	ENAH	Q8N8S7
51072	0.642974	MEMO1	Q9Y316
8048	0.642432	CSRP3	P50461
3643	0.642214	INSR	P06213
2130	0.641824	EWSR1	Q01844
8754	0.641603	ADAM9	Q13443
27429	0.641415	HTRA2	O43464
90249	0.639798	UNC5A	Q6ZN44
5691	0.639638	PSMB3	P49720
5067	0.638718	CNTN3	Q9P232
97	0.638386	ACYP1	P07311
10899	0.637336	JTB	O76095
230	0.635246	ALDOC	P09972
10439	0.633257	OLFM1	Q99784
5412	0.632589	UBL3	O95164
10938	0.630029	EHD1	Q9H4M9
4685	0.629118	NCAM2	O15394
139065	0.628029	SLITRK4	Q8IW52
4915	0.627183	NTRK2	Q16620
23646	0.625705	PLD3	Q8IV08
29	0.624939	ABR	Q12979
6648	0.624186	SOD2	P04179
79845	0.622955	RNF122	Q9H9V4
10078	0.621551	TSSC4	Q9Y5U2
3459	0.621346	IFNGR1	P15260
682	0.620625	BSG	P35613
54205	0.620536	CYCS	P99999
57453	0.619864	DSCAML1	Q8TD84
114990	0.618774	VASN	Q6EMK4
9378	0.61803	NRXN1	P58400
84623	0.617171	KIRREL3	Q8IZU9
5413	0.61536	SEPTIN5	Q99719
2023	0.615048	ENO1	P06733
26011	0.614997	TENM4	Q6N022
5216	0.61488	PFN1	P07737
1271	0.614779	CNTFR	P26992
6860	0.613086	SYT4	Q9H2B2
10231	0.612872	RCAN2	Q14206
65009	0.612087	NDRG4	Q9ULP0
9394	0.611368	HS6ST1	O60243
3482	0.611085	IGF2R	P11717
5101	0.611011	PCDH9	Q9HC56
219699	0.610146	UNC5B	Q8IZJ1
8666	0.609634	EIF3G	O75821
6624	0.609387	FSCN1	Q16658
26020	0.60768	LRP10	Q7Z4F1
10443	0.605443	N4BP2L2	Q92802
81567	0.60538	TXNDC5	Q8NBS9
4085	0.604134	MAD2L1	Q13257
6585	0.604023	SLIT1	O75093
3417	0.603745	IDH1	O75874
6903	0.603696	TBCC	Q15814
5064	0.602419	PALM	O75781
49860	0.601968	CRNN	Q9UBG3
51280	0.600169	GOLM1	Q8NBJ4
27253	0.59998	PCDH17	O14917
116986	0.599909	AGAP2	Q99490
51726	0.59945	DNAJB11	Q9UBS4
23380	0.599212	SRGAP2	O75044
58494	0.59919	JAM2	P57087
7804	0.596764	LRP8	Q14114
10541	0.590514	ANP32B	Q92688
51540	0.590136	SCLY	Q96I15
9768	0.58997	PCLAF	Q15004
258010	0.589804	SVIP	Q8NHG7
11024	0.589309	LILRA1	O75019
2589	0.589299	GALNT1	Q10472
57446	0.588634	NDRG3	Q9UGV2
285220	0.587828	EPHA6	Q9UF33
4729	0.587501	NDUFV2	P19404
4756	0.58721	NEO1	Q92859
5052	0.585806	PRDX1	Q06830
113201	0.585456	GOLM2	Q6P4E1
826	0.585174	CAPNS1	P04632
51293	0.584481	CD320	Q9NPF0
3897	0.583604	L1CAM	P32004
10809	0.583437	STARD10	Q9Y365
79982	0.583012	DNAJB14	Q8TBM8
8050	0.582399	PDHX	O00330
435	0.581602	ASL	P04424
1974	0.580058	EIF4A2	Q14240
2045	0.577664	EPHA7	Q15375
1826	0.577586	DSCAM	O60469
4920	0.577559	ROR2	Q01974
4179	0.576704	CD46	P15529
253559	0.576114	CADM2	Q8N3J6
10959	0.576068	TMED2	Q15363
115761	0.574966	ARL11	Q969Q4
54788	0.574716	DNAJB12	Q9NXW2
26050	0.573998	SLITRK5	O94991
64101	0.573619	LRRC4	Q9HBW1
129804	0.573216	FBLN7	Q53RD9
11051	0.572811	NUDT21	O43809
25884	0.572386	CHRDL2	Q6WN34
11249	0.572185	NXPH2	O95156
433	0.57136	ASGR2	P07307
577	0.568462	ADGRB3	O60242
23705	0.566926	CADM1	Q9BY67
50865	0.565951	HEBP1	Q9NRV9
7328	0.564558	UBE2H	P62256
338339	0.563118	CLEC4D	Q8WXI8
1033	0.562967	CDKN3	Q16667
7078	0.561649	TIMP3	P35625
245812	0.561323	CNPY4	Q8N129
6821	0.560801	SUOX	P51687
7301	0.560653	TYRO3	Q06418
637	0.560451	BID	P55957
84309	0.559649	NUDT16L1	Q9BRJ7
10678	0.559343	B3GNT2	Q9NY97
9308	0.558312	CD83	Q01151
51027	0.558175	BOLA1	Q9Y3E2
26045	0.556415	LRRTM2	O43300
151647	0.554902	TAFA4	Q96LR4
347902	0.552952	AMIGO2	Q86SJ2
79987	0.552071	SVEP1	Q4LDE5
5504	0.551278	PPP1R2	P41236
375567	0.551116	VWC2	Q2TAL6
399947	0.549541	C11orf87	Q6NUJ2
57863	0.549298	CADM3	Q8N126
5795	0.548359	PTPRJ	Q12913
2314	0.54731	FLII	Q13045
3977	0.547266	LIFR	P42702
3035	0.547063	HARS1	P12081
81831	0.546145	NETO2	Q8NC67
7324	0.545547	UBE2E1	P51965
28514	0.54463	DLL1	O00548
55033	0.544122	FKBP14	Q9NWM8
284422	0.544115	SMIM24	O75264
6001	0.542156	RGS10	O43665
1650	0.541572	DDOST	P39656
10525	0.54082	HYOU1	Q9Y4L1
481	0.540049	ATP1B1	P05026
4851	0.539636	NOTCH1	P46531
394	0.539388	ARHGAP5	Q13017
10204	0.539109	NUTF2	P61970
55151	0.537859	TMEM38B	Q9NVV0
57124	0.537792	CD248	Q9HCU0
93185	0.537367	IGSF8	Q969P0
11010	0.536291	GLIPR1	P48060
9719	0.536274	ADAMTSL2	Q86TH1
148738	0.536108	HJV	Q6ZVN8
54495	0.534775	TMX3	Q96JJ7
2051	0.533886	EPHB6	O15197
10718	0.533704	NRG3	P56975
56934	0.533319	CA10	Q9NS85
84263	0.53296	HSDL2	Q6YN16
10241	0.532403	CALCOCO2	Q13137
84064	0.532395	HDHD2	Q9H0R4
1005	0.531409	CDH7	Q9ULB5
163351	0.531004	GBP6	Q6ZN66
10648	0.530823	SCGB1D1	O95968
4023	0.530775	LPL	P06858
388	0.530571	RHOB	P62745
643847	0.530163	PGA4	P0DJD7
6695	0.529214	SPOCK1	Q08629
2619	0.529017	GAS1	P54826
7873	0.528494	MANF	P55145
84193	0.528212	SETD3	Q86TU7
168667	0.528175	BMPER	Q8N8U9
81849	0.527777	ST6GALNAC5	Q9BVH7
22827	0.527381	PUF60	Q9UHX1
2350	0.527285	FOLR2	P14207
994	0.527106	CDC25B	P30305
25789	0.526614	TMEM59L	Q9UK28
5361	0.52617	PLXNA1	Q9UIW2
729447	0.525638	GAGE2A	Q6NT46
23114	0.525551	NFASC	O94856
257106	0.525209	ARHGAP30	Q7Z6I6
8646	0.524701	CHRD	Q9H2X0
8324	0.524515	FZD7	O75084
78987	0.524038	CRELD1	Q96HD1
93273	0.523854	LEMD1	Q68G75
29916	0.523794	SNX11	Q9Y5W9
22871	0.523732	NLGN1	Q8N2Q7
10130	0.52355	PDIA6	Q15084
10090	0.52079	UST	Q9Y2C2
114784	0.52071	CSMD2	Q7Z408
54928	0.519849	BPNT2	Q9NX62
284656	0.519539	EPHA10	Q5JZY3
55799	0.519433	CACNA2D3	Q8IZS8
152330	0.518284	CNTN4	Q8IWV2
64218	0.517523	SEMA4A	Q9H3S1
2047	0.517483	EPHB1	P54762
7143	0.516126	TNR	Q92752
11141	0.515917	IL1RAPL1	Q9NZN1
145226	0.515837	RDH12	Q96NR8
1979	0.514592	EIF4EBP2	Q13542
9910	0.514224	RABGAP1L	Q5R372
54972	0.51387	TMEM132A	Q24JP5
8326	0.512942	FZD9	O00144
10905	0.512819	MAN1A2	O60476
53616	0.5126	ADAM22	Q9P0K1
53942	0.51248	CNTN5	O94779
1397	0.512093	CRIP2	P52943
84870	0.511233	RSPO3	Q9BXY4
57763	0.511194	ANKRA2	Q9H9E1
10154	0.510761	PLXNC1	O60486
84285	0.510559	EIF1AD	Q8N9N8
7430	0.510497	EZR	P15311
57447	0.510453	NDRG2	Q9UN36
2535	0.510301	FZD2	Q14332
1388	0.510215	ATF6B	Q99941
30851	0.509877	TAX1BP3	O14907
125	0.50966	ADH1B	P00325
8994	0.508745	LIMD1	Q9UGP4
171483	0.507009	FAM9B	Q8IZU0
2861	0.504536	GPR37	O15354
9920	0.503773	KBTBD11	O94819
161357	0.503129	MDGA2	Q7Z553
1824	0.502135	DSC2	Q02487
784	0.501923	CACNB3	P54284
1738	0.501243	DLD	P09622
56963	0.500544	RGMA	Q96B86
6091	0.499996	ROBO1	Q9Y6N7
58191	0.499619	CXCL16	Q9H2A7
4059	0.499499	BCAM	P50895
824	0.499489	CAPN2	P17655
83543	0.498902	AIF1L	Q9BQI0
8745	0.498557	ADAM23	O75077
3339	0.498124	HSPG2	P98160
8325	0.497925	FZD8	Q9H461
4036	0.497674	LRP2	P98164
3306	0.497428	HSPA2	P54652
2923	0.497308	PDIA3	P30101
22926	0.496924	ATF6	P18850
3321	0.496773	IGSF3	O75054
9532	0.494735	BAG2	O95816
10519	0.494605	CIB1	Q99828
2050	0.492976	EPHB4	P54760
152002	0.492795	XXYLT1	Q8NBI6
5097	0.492417	PCDH1	Q08174
23129	0.492412	PLXND1	Q9Y4D7
27087	0.491993	B3GAT1	Q9P2W7
659	0.491607	BMPR2	Q13873
333	0.489687	APLP1	P51693
50863	0.489059	NTM	Q9P121
10076	0.489021	PTPRU	Q92729
8974	0.487731	P4HA2	O15460
5819	0.486771	NECTIN2	Q92692
135228	0.486712	CD109	Q6YHK3
2648	0.486651	KAT2A	Q92830
65989	0.485373	DLK2	Q6UY11
955	0.484838	ENTPD6	O75354
6876	0.484681	TAGLN	Q01995
575	0.484463	ADGRB1	O14514
687	0.484439	KLF9	Q13886
26047	0.484129	CNTNAP2	Q9UHC6
340706	0.48342	VWA2	Q5GFL6
84918	0.483339	LRP11	Q86VZ4
3705	0.483268	ITPK1	Q13572
51078	0.482554	THAP4	Q8WY91
64841	0.482435	GNPNAT1	Q96EK6
3661	0.481851	IRF3	Q14653
55666	0.481765	NPLOC4	Q8TAT6
1946	0.480302	EFNA5	P52803
54682	0.479678	MANSC1	Q9H8J5
25758	0.479541	KIAA1549L	Q6ZVL6
80031	0.478055	SEMA6D	Q8NFY4
284361	0.47755	EMC10	Q5UCC4
404037	0.475576	HAPLN4	Q86UW8
3303	0.475036	HSPA1A	P0DMV8
831	0.474751	CAST	P20810
57689	0.474507	LRRC4C	Q9HCJ2
56005	0.473953	MYDGF	Q969H8
7322	0.47314	UBE2D2	P62837
10507	0.472389	SEMA4D	Q92854
7075	0.472225	TIE1	P35590
2049	0.471401	EPHB3	P54753
10406	0.470321	WFDC2	Q14508
51191	0.46862	HERC5	Q9UII4
402665	0.468562	IGLON5	A6NGN9
3135	0.46781	HLA-G	P17693
8450	0.467798	CUL4B	Q13620
29071	0.467657	C1GALT1C1	Q96EU7
2621	0.466885	GAS6	Q14393
56975	0.466808	FAM20C	Q8IXL6
3313	0.466593	HSPA9	P38646
23071	0.466549	ERP44	Q9BS26
8578	0.466037	SCARF1	Q14162
553115	0.46592	PEF1	Q9UBV8
143903	0.465022	LAYN	Q6UX15
57613	0.464569	FAM234B	A2RU67
1436	0.464354	CSF1R	P07333
137970	0.463821	UNC5D	Q6UXZ4
59277	0.46378	NTN4	Q9HB63
7123	0.46233	CLEC3B	P05452
4038	0.462324	LRP4	O75096
202052	0.461964	DNAJC18	Q9H819
4854	0.460806	NOTCH3	Q9UM47
729920	0.460373	CRPPA	A4D126
23767	0.459985	FLRT3	Q9NZU0
84293	0.459387	PRXL2A	Q9BRX8
7265	0.459151	TTC1	Q99614
4925	0.458546	NUCB2	P80303
7855	0.458236	FZD5	Q13467
27248	0.458056	ERLEC1	Q96DZ1
7316	0.457573	UBC	P0CG48
9331	0.455881	B4GALT6	Q9UBX8
1944	0.455617	EFNA3	P52797
8704	0.455405	B4GALT2	O60909
2583	0.455338	B4GALNT1	Q00973
114088	0.454712	TRIM9	Q9C026
2524	0.45444	FUT2	Q10981
3046	0.453912	HBE1	P02100
214	0.453645	ALCAM	Q13740
2675	0.453644	GFRA2	O00451
3572	0.453549	IL6ST	P40189
51560	0.453158	RAB6B	Q9NRW1
91584	0.449993	PLXNA4	Q9HCM2
6092	0.449035	ROBO2	Q9HCK4
785	0.448809	CACNB4	O00305
114794	0.447242	ELFN2	Q5R3F8
23544	0.447094	SEZ6L	Q9BYH1
4247	0.446401	MGAT2	Q10469
85002	0.445635	FAM86B1	Q8N7N1
654429	0.445201	LRTM2	Q8N967
6834	0.445002	SURF1	Q15526
9589	0.444691	WTAP	Q15007
6396	0.444272	SEC13	P55735
64399	0.443942	HHIP	Q96QV1
84869	0.442641	CBR4	Q8N4T8
283635	0.442538	FAM177A1	Q8N128
83700	0.441399	JAM3	Q9BX67
64478	0.438282	CSMD1	Q96PZ7
8633	0.437203	UNC5C	O95185
9332	0.436759	CD163	Q86VB7
23284	0.436584	ADGRL3	Q9HAR2
2044	0.43538	EPHA5	P54756
90952	0.435246	ESAM	Q96AP7
3340	0.435187	NDST1	P52848
6447	0.435055	SCG5	P05408
54431	0.434575	DNAJC10	Q8IXB1
1463	0.434449	NCAN	O14594
154790	0.433451	CLEC2L	P0C7M8
3815	0.431734	KIT	P10721
25932	0.430394	CLIC4	Q9Y696
50632	0.42942	CALY	Q9NYX4
59274	0.428578	TLNRD1	Q9H1K6
114795	0.428229	TMEM132B	Q14DG7
1113	0.427924	CHGA	P10645
57045	0.427887	TWSG1	Q9GZX9
1636	0.427825	ACE	P12821
23105	0.427812	FSTL4	Q6MZW2
9639	0.427161	ARHGEF10	O15013
92	0.427045	ACVR2A	P27037
665	0.426322	BNIP3L	O60238
57184	0.426077	FAM219B	Q5XKK7
389125	0.424132	MUSTN1	Q8IVN3
7087	0.419882	ICAM5	Q9UMF0
2005	0.419844	ELK4	P28324
114757	0.419091	CYGB	Q8WWM9
56261	0.418765	GPCPD1	Q9NPB8
54504	0.418471	CPVL	Q9H3G5
419	0.41791	ART3	Q13508
5156	0.416529	PDGFRA	P16234
4921	0.416237	DDR2	Q16832
5236	0.416236	PGM1	P36871
57555	0.415516	NLGN2	Q8NFZ4
84632	0.415432	AFAP1L2	Q8N4X5
283820	0.415374	NOMO2	Q5JPE7
1630	0.415259	DCC	P43146
5447	0.414029	POR	P16435
55959	0.414017	SULF2	Q8IWU5
5947	0.413471	RBP1	P09455
80781	0.413142	COL18A1	P39060
10755	0.412	GIPC1	O14908
2335	0.410992	FN1	P02751
55742	0.409927	PARVA	Q9NVD7
4249	0.408556	MGAT5	Q09328
4325	0.408347	MMP16	P51512
343637	0.408233	RSPO4	Q2I0M5
4919	0.408127	ROR1	Q01973
10728	0.406665	PTGES3	Q15185
55501	0.405974	CHST12	Q9NRB3
29126	0.405068	CD274	Q9NZQ7
56920	0.403347	SEMA3G	Q9NS98
10397	0.402988	NDRG1	Q92597
57125	0.402976	PLXDC1	Q8IUK5
112849	0.402093	L3HYPDH	Q96EM0
7049	0.400431	TGFBR3	Q03167
2495	0.400287	FTH1	P02794
2043	0.400151	EPHA4	P54764
22986	0.400024	SORCS3	Q9UPU3
7450	0.39976	VWF	P04275
266722	0.399715	HS6ST3	Q8IZP7
10267	0.399669	RAMP1	O60894
5241	0.398101	PGR	P06401
10019	0.396018	SH2B3	Q9UQQ2
22854	0.394958	NTNG1	Q9Y2I2
51379	0.394808	CRLF3	Q8IUI8
5213	0.393583	PFKM	P08237
83715	0.393572	ESPN	B1AK53
114798	0.392997	SLITRK1	Q96PX8
257194	0.391355	NEGR1	Q7Z3B1
4045	0.390782	LSAMP	Q13449
54664	0.389578	TMEM106B	Q9NUM4
114815	0.389482	SORCS1	Q8WY21
84631	0.389009	SLITRK2	Q9H156
8128	0.388937	ST8SIA2	Q92186
151887	0.388828	CCDC80	Q76M96
10972	0.388437	TMED10	P49755
64084	0.386643	CLSTN2	Q9H4D0
4040	0.385223	LRP6	O75581
2895	0.384628	GRID2	O43424
196500	0.384104	PIANP	Q8IYJ0
4360	0.383847	MRC1	P22897
4340	0.382204	MOG	Q16653
3590	0.382097	IL11RA	Q14626
121256	0.381159	TMEM132D	Q14C87
9672	0.380585	SDC3	O75056
929	0.379971	CD14	P08571
27255	0.378737	CNTN6	Q9UQ52
79415	0.378382	CYBC1	Q9BQA9
5440	0.378009	POLR2K	P53803
9917	0.377513	FAM20B	O75063
1950	0.377432	EGF	P01133
23308	0.37736	ICOSLG	O75144
2260	0.3773	FGFR1	P11362
84197	0.377199	POMK	Q9H5K3
9146	0.377008	HGS	O14964
11253	0.37593	MAN1B1	Q9UKM7
50937	0.37568	CDON	Q4KMG0
54814	0.375201	QPCTL	Q9NXS2
25797	0.374705	QPCT	Q16769
64089	0.374168	SNX16	P57768
5802	0.373753	PTPRS	Q13332
11120	0.373061	BTN2A1	Q7KYR7
27242	0.371211	TNFRSF21	O75509
84063	0.370783	KIRREL2	Q6UWL6
114900	0.369965	C1QTNF4	Q9BXJ3
84335	0.369619	AKT1S1	Q96B36
4684	0.369575	NCAM1	P13591
56647	0.369345	BCCIP	Q9P287
10461	0.367849	MERTK	Q12866
4248	0.367557	MGAT3	Q09327
400831	0.367028	C20orf202	A1L168
169714	0.366929	QSOX2	Q6ZRP7
400916	0.36617	CHCHD10	Q8WYQ3
55861	0.36588	DBNDD2	Q9BQY9
55554	0.365879	KLK15	Q9H2R5
81832	0.364338	NETO1	Q8TDF5
116135	0.363289	LRRC3B	Q96PB8
9242	0.36292	MSC	O60682
26229	0.361912	B3GAT3	O94766
158326	0.361502	FREM1	Q5H8C1
80303	0.359498	EFHD1	Q9BUP0
55901	0.358091	THSD1	Q9NS62
3570	0.358054	IL6R	P08887
9647	0.357927	PPM1F	P49593
4345	0.357558	CD200	P41217
114805	0.356141	GALNT13	Q8IUC8
329	0.356111	BIRC2	Q13490
59084	0.352775	ENPP5	Q9UJA9
140809	0.35008	SRXN1	Q9BYN0
54437	0.349742	SEMA5B	Q9P283
83886	0.348057	PRSS27	Q9BQR3
9369	0.347452	NRXN3	Q9Y4C0
51596	0.344781	CUTA	O60888
58513	0.344111	EPS15L1	Q9UBC2
1893	0.342132	ECM1	Q16610
140606	0.34095	SELENOM	Q8WWX9
116442	0.340026	RAB39B	Q96DA2
653	0.339217	BMP5	P22003
2530	0.33845	FUT8	Q9BYC5
10695	0.335878	CNPY3	Q9BT09
9902	0.334405	MRC2	Q9UBG0
53917	0.333429	RAB24	Q969Q5
8534	0.333168	CHST1	O43916
10384	0.333139	BTN3A3	O00478
5501	0.331533	PPP1CC	P36873
55696	0.329976	RBM22	Q9NW64
9562	0.327324	MINPP1	Q9UNW1
6780	0.326973	STAU1	O95793
8459	0.32554	TPST2	O60704
642968	0.325254	FAM163B	P0C2L3
29091	0.32449	STXBP6	Q8NFX7
165257	0.321684	C1QL2	Q7Z5L3
2760	0.321212	GM2A	P17900
5738	0.321083	PTGFRN	Q9P2B2
9236	0.319842	CCPG1	Q9ULG6
84957	0.317719	RELT	Q969Z4
1101	0.310657	CHAD	O15335
5699	0.310537	PSMB10	P40306
51234	0.309915	EMC4	Q5J8M3
9024	0.309378	BRSK2	Q8IWQ3
2590	0.308663	GALNT2	Q10471
1604	0.307534	CD55	P08174
5239	0.306933	PGM5	Q15124
5861	0.306874	RAB1A	P62820
23558	0.306318	WBP2	Q969T9
113802	0.304713	HENMT1	Q5T8I9
53833	0.304661	IL20RB	Q6UXL0
51552	0.304652	RAB14	P61106
51557	0.302919	LGSN	Q5TDP6
8738	0.302354	CRADD	P78560
79623	0.29912	GALNT14	Q96FL9
57403	0.296834	RAB22A	Q9UL26
7184	0.292736	HSP90B1	P14625
145581	0.290964	LRFN5	Q96NI6
2571	0.290538	GAD1	Q99259
140689	0.289603	CBLN4	Q9NTU7
90121	0.288759	TSR2	Q969E8
25834	0.287465	MGAT4C	Q9UBM8
10501	0.285866	SEMA6B	Q9H3T3
654	0.284554	BMP6	P22004
5801	0.283778	PTPRR	Q15256
590	0.279165	BCHE	P06276
5126	0.278362	PCSK2	P16519
10590	0.276998	SCGN	O76038
4880	0.276332	NPPC	P23582
54567	0.275341	DLL4	Q9NR61
27344	0.274248	PCSK1N	Q9UHG2
5066	0.271734	PAM	P19021
400569	0.270971	MED11	Q9P086
4233	0.267977	MET	P08581
65078	0.266111	RTN4R	Q9BZR6
285704	0.265597	RGMB	Q6NW40
22883	0.260629	CLSTN1	O94985
4357	0.257258	MPST	P25325
1264	0.255954	CNN1	P51911
55118	0.255853	CRTAC1	Q9NQ79
440574	0.255813	MICOS10	Q5TGZ0
80347	0.254657	COASY	Q13057
146760	0.251715	RTN4RL1	Q86UN2
11197	0.249974	WIF1	Q9Y5W5
8829	0.249823	NRP1	O14786
8764	0.249573	TNFRSF14	Q92956
6750	0.246005	SST	P61278
645191	0.244133	LINGO3	P0C6S8
7432	0.241828	VIP	P01282
5602	0.237435	MAPK10	P53779
4240	0.23097	MFGE8	Q08431
54165	0.230312	DCUN1D1	Q96GG9
27122	0.22931	DKK3	Q9UBP4
23630	0.227923	KCNE5	Q9UJ90
54829	0.219674	ASPN	Q9BXN1
5768	0.21816	QSOX1	O00391
7079	0.214872	TIMP4	Q99727
129684	0.210419	CNTNAP5	Q8WYK1
182	0.208716	JAG1	P78504
