# Supplementary material
Source: Research Square preprint supplement (doi:10.21203/rs.3.rs-8960775/v1)
Supplement: Supplementary file 2 [file 991a53220cd5ec571a33cf83.xlsx]

## Sheet: Sheet 1
Cluster	EntrezGeneID	EntrezGeneSymbol	UniProt
1	11101	ATE1	O95260
1	123688	HYKK	A2RU49
1	2153	F5	P12259
1	2308	FOXO1	Q12778
1	23510	KCTD2	Q14681
1	402	ARL2	P36404
1	6284	S100A13	Q99584
1	6636	SNRPF	P62306
1	6902	TBCA	O75347
1	7480	WNT10B	O00744
1	8543	LMO4	P61968
1	8608	RDH16	O75452
1	9108	MTMR7	Q9Y216
1	9537	TP53I11	O14683
2	10000	AKT3	Q9Y243
2	100101629	GAGE2D	Q9UEU5
2	100101629	GAGE2D	Q9UEU5
2	10011	SRA1	Q9HD15
2	100131187	TSTD1	Q8NFU3
2	100287284	MANSC4	A6NHS7
2	10040	TOM1L1	O75674
2	10047	CST8	O60676
2	10068	IL18BP	O95998
2	10078	TSSC4	Q9Y5U2
2	10082	GPC6	Q9Y625
2	1009	CDH11	P55287
2	1009	CDH11	P55287
2	1009	CDH11	P55287
2	1010	CDH12	P55289
2	1010	CDH12	P55289
2	10155	TRIM28	Q13263
2	10231	RCAN2	Q14206
2	10241	CALCOCO2	Q13137
2	10327	AKR1A1	P14550
2	10380	BPNT1	O95861
2	10409	BASP1	P80723
2	10418	SPON1	Q9HCB6
2	10418	SPON1	Q9HCB6
2	10456	HAX1	O00165
2	10457	GPNMB	Q14956
2	10457	GPNMB	Q14956
2	10457	GPNMB	Q14956
2	10457	GPNMB	Q14956
2	10490	VTI1B	Q9UEU0
2	10516	FBLN5	Q9UBX5
2	10516	FBLN5	Q9UBX5
2	10522	DEAF1	O75398
2	10541	ANP32B	Q92688
2	10551	AGR2	O95994
2	10590	SCGN	O76038
2	10590	SCGN	O76038
2	10598	AHSA1	O95433
2	10611	PDLIM5	Q96HC4
2	10726	NUDC	Q9Y266
2	10726	NUDC	Q9Y266
2	1073	CFL2	Q9Y281
2	10753	CAPN9	O14815
2	10755	GIPC1	O14908
2	10755	GIPC1	O14908
2	1080	CFTR	P13569
2	10808	HSPH1	Q92598
2	10809	STARD10	Q9Y365
2	10814	CPLX2	Q6PUV4
2	10815	CPLX1	O14810
2	10857	PGRMC1	O00264
2	10882	C1QL1	O75973
2	10907	TXNL4A	P83876
2	10910	SUGT1	Q9Y2Z0
2	10935	PRDX3	P30048
2	10971	YWHAQ	P27348
2	10988	METAP2	P50579
2	11024	LILRA1	O75019
2	11027	LILRA2	Q8N149
2	11051	NUDT21	O43809
2	11075	STMN2	Q93045
2	11164	NUDT5	Q9UKK9
2	11165	NUDT3	O95989
2	1118	CHIT1	Q13231
2	1118	CHIT1	Q13231
2	1120	CHKB	Q9Y259
2	1120	CHKB	Q9Y259
2	11212	PLPBP	O94903
2	1123	CHN1	P15882
2	112476	PRRT2	Q7Z6L0
2	112487	DTD2	Q96FN9
2	113201	GOLM2	Q6P4E1
2	113201	GOLM2	Q6P4E1
2	11326	VSIG4	Q9Y279
2	11337	GABARAP	O95166
2	11337	GABARAP	O95166
2	11338	U2AF2	P26368
2	11344	TWF2	Q6IBS0
2	11345	GABARAPL2	P60520
2	113675	SDSL	Q96GA7
2	114088	TRIM9	Q9C026
2	114897	C1QTNF1	Q9BXJ1
2	1155	TBCB	Q99426
2	116986	AGAP2	Q99490
2	116988	AGAP3	Q96P47
2	117584	RFFL	Q8WZ73
2	118426	BORCS5	Q969J3
2	122664	TPPP2	P59282
2	126393	HSPB6	O14558
2	126792	B3GALT6	Q96L58
2	128387	TATDN3	Q17R31
2	129293	TRABD2A	Q86V40
2	134492	NUDCD2	Q8WVJ2
2	135112	NCOA7	Q8NI08
2	1362	CPD	O75976
2	1368	CPM	P14384
2	1368	CPM	P14384
2	1397	CRIP2	P52943
2	1398	CRK	P46108
2	1398	CRK	P46108
2	1399	CRKL	P46109
2	140462	ASB9	Q96DX5
2	140576	S100A16	Q96FQ6
2	1414	CRYBB1	P53674
2	143098	MPP7	Q5T2T1
2	143187	VTI1A	Q96AJ9
2	1435	CSF1	P09603
2	1435	CSF1	P09603
2	145553	MDP1	Q86V88
2	147495	APCDD1	Q8J025
2	1476	CSTB	P04080
2	148281	SYT6	Q5T7P8
2	1496	CTNNA2	P26232
2	1519	CTSO	P43234
2	152137	CCDC50	Q8IVM0
2	153571	C5orf38	Q86SI9
2	161	AP2A2	O94973
2	162	AP1B1	Q10567
2	1632	ECI1	P42126
2	163351	GBP6	Q6ZN66
2	1635	DCTD	P32321
2	163590	TOR1AIP2	Q8NFQ8
2	165721	DNAJB8	Q8NHS0
2	1676	DFFA	O00273
2	168667	BMPER	Q8N8U9
2	168667	BMPER	Q8N8U9
2	1729	DIAPH1	O60610
2	1740	DLG2	Q15700
2	1742	DLG4	P78352
2	1775	DNASE1L2	Q92874
2	1837	DTNA	Q9Y4J8
2	1837	DTNA	Q9Y4J8
2	1854	DUT	P33316
2	1854	DUT	P33316
2	1945	EFNA4	P52798
2	1945	EFNA4	P52798
2	1974	EIF4A2	Q14240
2	1974	EIF4A2	Q14240
2	1975	EIF4B	P23588
2	1982	EIF4G2	P78344
2	199	AIF1	P55008
2	1992	SERPINB1	P30740
2	1993	ELAVL2	Q12926
2	2023	ENO1	P06733
2	2026	ENO2	P09104
2	2026	ENO2	P09104
2	203245	NAIF1	Q69YI7
2	204	AK2	P54819
2	2042	EPHA3	P29320
2	2054	STX2	P32856
2	2065	ERBB3	P21860
2	207	AKT1	P31749
2	207	AKT1	P31749
2	2130	EWSR1	Q01844
2	2139	EYA2	O00167
2	2170	FABP3	P05413
2	2170	FABP3	P05413
2	221914	GPC2	Q8N158
2	222663	SCUBE3	Q8IX30
2	226	ALDOA	P04075
2	2262	GPC5	P78333
2	2272	FHIT	P49789
2	2280	FKBP1A	P62942
2	2288	FKBP4	Q02790
2	22919	MAPRE1	Q15691
2	22919	MAPRE1	Q15691
2	22924	MAPRE3	Q9UPY8
2	22924	MAPRE3	Q9UPY8
2	22931	RAB18	Q9NP72
2	23019	CNOT1	A5YKK6
2	231	AKR1B1	P15121
2	231	AKR1B1	P15121
2	23111	SPART	Q8N0X7
2	23112	TNRC6B	Q9UPQ9
2	2314	FLII	Q13045
2	23163	GGA3	Q9NZ52
2	23190	UBXN4	Q92575
2	23190	UBXN4	Q92575
2	23197	FAF2	Q96CS3
2	23208	SYT11	Q9BT88
2	2321	FLT1	P17948
2	2321	FLT1	P17948
2	23224	SYNE2	Q8WXH0
2	23236	PLCB1	Q9NQ66
2	23259	DDHD2	O94830
2	23286	WWC1	Q8IX03
2	23386	NUDCD3	Q8IVD9
2	23491	CES3	Q6UWW8
2	23491	CES3	Q6UWW8
2	23508	TTC9	Q92623
2	23576	DDAH1	O94760
2	23584	VSIG2	Q96IQ7
2	23640	HSPBP1	Q9NZL4
2	23646	PLD3	Q8IV08
2	23654	PLXNB2	O15031
2	23654	PLXNB2	O15031
2	23682	RAB38	P57729
2	23710	GABARAPL1	Q9H0R8
2	23768	FLRT2	O43155
2	238	ALK	Q9UM73
2	2512	FTL	P02792
2	2550	GABBR1	Q9UBS5
2	2574	GAGE2B	Q13066
2	25796	PGLS	O95336
2	25927	CNRIP1	Q96F85
2	25949	SYF2	O95926
2	2596	GAP43	P17677
2	25996	REXO2	Q9Y3B8
2	26007	TKFC	Q3LXA3
2	26018	LRIG1	Q96JA1
2	26020	LRP10	Q7Z4F1
2	26025	PCDHGA12	O60330
2	26088	GGA1	Q9UJY5
2	2617	GARS1	P41250
2	261726	TIPRL	O75663
2	26275	HIBCH	Q6NVY1
2	2644	GCHFR	P30047
2	2664	GDI1	P31150
2	2664	GDI1	P31150
2	2665	GDI2	P50395
2	266977	ADGRF1	Q5T601
2	2670	GFAP	P14136
2	2670	GFAP	P14136
2	2671	GFER	P55789
2	2674	GFRA1	P56159
2	27036	SIGLEC7	Q9Y286
2	27101	CACYBP	Q9HB71
2	27183	VPS4A	Q9UN37
2	27253	PCDH17	O14917
2	27289	RND1	Q92730
2	27295	PDLIM3	Q53GG5
2	273	AMPH	P49418
2	2739	GLO1	Q04760
2	2752	GLUL	P15104
2	2764	GMFB	P60983
2	2806	GOT2	P00505
2	2806	GOT2	P00505
2	2810	SFN	P31947
2	2817	GPC1	P35052
2	2821	GPI	P06744
2	2821	GPI	P06744
2	283659	PRTG	Q2VWP7
2	283871	PGP	A6NDG6
2	284	ANGPT1	Q15389
2	284021	MILR1	Q7Z6M3
2	284021	MILR1	Q7Z6M3
2	285	ANGPT2	O15123
2	285	ANGPT2	O15123
2	285590	SH3PXD2B	A1X283
2	29	ABR	Q12979
2	29082	CHMP4A	Q9BY43
2	29085	PHPT1	Q9NRX4
2	29108	PYCARD	Q9ULZ3
2	29114	TAGLN3	Q9UI15
2	2936	GSR	P00390
2	2937	GSS	P48637
2	2950	GSTP1	P09211
2	2950	GSTP1	P09211
2	29766	TMOD3	Q9NYL9
2	29767	TMOD2	Q9NZR1
2	2987	GUK1	Q16774
2	29907	SNX15	Q9NRS6
2	29924	EPN1	Q9Y6I3
2	29934	SNX12	Q9UMY4
2	29968	PSAT1	Q9Y617
2	29978	UBQLN2	Q9UHD9
2	3029	HAGH	Q16775
2	3035	HARS1	P12081
2	3082	HGF	P14210
2	30833	NT5C	Q8TCD5
2	3093	UBE2K	P61086
2	3157	HMGCS1	Q01581
2	3157	HMGCS1	Q01581
2	3176	HNMT	P50135
2	318	NUDT2	P50583
2	3241	HPCAL1	P37235
2	3241	HPCAL1	P37235
2	3242	HPD	P32754
2	3251	HPRT1	P00492
2	3267	AGFG1	P52594
2	3300	DNAJB2	P25686
2	3303	HSPA1A	P0DMV8
2	3306	HSPA2	P54652
2	3312	HSPA8	P11142
2	3320	HSP90AA1	P07900
2	3326	HSP90AB1	P08238
2	3329	HSPD1	P10809
2	3339	HSPG2	P98160
2	338339	CLEC4D	Q8WXI8
2	338339	CLEC4D	Q8WXI8
2	340277	FAM221A	A4D161
2	340419	RSPO2	Q6UXX9
2	340419	RSPO2	Q6UXX9
2	340543	TCEAL5	Q5H9L2
2	3417	IDH1	O75874
2	3422	IDI1	Q13907
2	347252	IGFBPL1	Q8WX77
2	3476	IGBP1	P78318
2	3480	IGF1R	P08069
2	3482	IGF2R	P11717
2	3482	IGF2R	P11717
2	355	FAS	P25445
2	355	FAS	P25445
2	355	FAS	P25445
2	355	FAS	P25445
2	3603	IL16	Q14005
2	3612	IMPA1	P29218
2	3623	INHA	P05111
2	3661	IRF3	Q14653
2	3727	JUND	P17535
2	374946	DRAXIN	Q8NBI3
2	375	ARF1	P84077
2	375449	MAST4	O15021
2	375790	AGRN	O00468
2	375790	AGRN	O00468
2	387082	SUMO4	Q6EEV6
2	388	RHOB	P62745
2	388962	BOLA3	Q53S33
2	389125	MUSTN1	Q8IVN3
2	3897	L1CAM	P32004
2	3909	LAMA3	Q16787
2	392	ARHGAP1	Q07960
2	392	ARHGAP1	Q07960
2	3925	STMN1	P16949
2	397	ARHGDIB	P52566
2	3977	LIFR	P42702
2	404636	DENND10	Q8TCE6
2	4085	MAD2L1	Q13257
2	4089	SMAD4	Q13485
2	4090	SMAD5	Q99717
2	414149	ACBD7	Q8N6N7
2	4189	DNAJB9	Q9UBS3
2	4190	MDH1	P40925
2	4190	MDH1	P40925
2	4199	ME1	P48163
2	4242	MFNG	O00587
2	4282	MIF	P14174
2	4282	MIF	P14174
2	4287	ATXN3	P54252
2	43	ACHE	P22303
2	43	ACHE	P22303
2	4306	NR3C2	P08235
2	4319	MMP10	P09238
2	4319	MMP10	P09238
2	4325	MMP16	P51512
2	4325	MMP16	P51512
2	435	ASL	P04424
2	435	ASL	P04424
2	4351	MPI	P34949
2	4359	MPZ	P25189
2	439921	MXRA7	P84157
2	440712	RHEX	Q6ZWK4
2	441549	CDNF	Q49AH0
2	441549	CDNF	Q49AH0
2	444	ASPH	Q12797
2	4482	MSRA	Q9UJ68
2	4682	NUBP1	P53384
2	4744	NEFH	P12036
2	4747	NEFL	P07196
2	475	ATOX1	O00244
2	48	ACO1	P21399
2	482	ATP1B2	P14415
2	4830	NME1	P15531
2	4835	NQO2	P16083
2	4900	NRGN	Q92686
2	4973	OLR1	P78380
2	4973	OLR1	P78380
2	4973	OLR1	P78380
2	4982	TNFRSF11B	O00300
2	49860	CRNN	Q9UBG3
2	5037	PEBP1	P30086
2	5049	PAFAH1B2	P68402
2	50613	UBQLN3	Q9H347
2	50614	GALNT9	Q9HCQ5
2	50861	STMN3	Q9NZ72
2	50865	HEBP1	Q9NRV9
2	5092	PCBD1	P61457
2	51015	ISOC1	Q96CN7
2	51024	FIS1	Q9Y3D6
2	51027	BOLA1	Q9Y3E2
2	51072	MEMO1	Q9Y316
2	51110	LACTB2	Q53H82
2	51232	CRIM1	Q9NZV1
2	51232	CRIM1	Q9NZV1
2	51232	CRIM1	Q9NZV1
2	51232	CRIM1	Q9NZV1
2	51280	GOLM1	Q8NBJ4
2	51280	GOLM1	Q8NBJ4
2	51287	COA4	Q9NYJ1
2	51327	AHSP	Q9NZD4
2	51389	RWDD1	Q9H446
2	51400	PPME1	Q9Y570
2	51466	EVL	Q9UI08
2	5147	PDE6D	O43924
2	51506	UFC1	Q9Y3C8
2	51517	NCKIPSD	Q9NZQ3
2	5153	PDE1B	Q01064
2	51540	SCLY	Q96I15
2	51550	CINP	Q9BW66
2	51559	NT5DC3	Q86UY8
2	51571	CYRIB	Q9NUQ9
2	51619	UBE2D4	Q9Y2X8
2	51645	PPIL1	Q9Y3C6
2	51661	FKBP7	Q9Y680
2	51673	TPPP3	Q9BW30
2	51719	CAB39	Q9Y376
2	5195	PEX14	O75381
2	5195	PEX14	O75381
2	5202	PFDN2	Q9UHV9
2	5203	PFDN4	Q9NQP4
2	5216	PFN1	P07737
2	522	ATP5PF	P18859
2	5223	PGAM1	P18669
2	5224	PGAM2	P15259
2	5230	PGK1	P00558
2	5251	PHEX	P78562
2	5272	SERPINB9	P50453
2	5284	PIGR	P01833
2	5300	PIN1	Q13526
2	5300	PIN1	Q13526
2	5306	PITPNA	Q00169
2	5329	PLAUR	Q03405
2	5333	PLCD1	P51178
2	5365	PLXNB3	Q9ULL4
2	5413	SEPTIN5	Q99719
2	54210	TREM1	Q9NP99
2	54517	PUS7	Q96PZ0
2	54557	SGTB	Q96EQ0
2	5463	POU6F1	Q14863
2	5478	PPIA	P62937
2	54910	SEMA4C	Q9C0C4
2	54936	ADPRS	Q9NX46
2	5494	PPM1A	P35813
2	5495	PPM1B	O75688
2	54957	TXNL4B	Q9NX01
2	5496	PPM1G	O15355
2	5502	PPP1R1A	Q13522
2	5524	PTPA	Q15257
2	5525	PPP2R5A	Q15172
2	5528	PPP2R5D	Q14738
2	5534	PPP3R1	P63098
2	55435	AP1AR	Q63HQ0
2	55568	GALNT10	Q86SR1
2	55666	NPLOC4	Q8TAT6
2	55684	RABL6	Q3YEC7
2	5573	PRKAR1A	P10644
2	55740	ENAH	Q8N8S7
2	55742	PARVA	Q9NVD7
2	5575	PRKAR1B	P31321
2	5577	PRKAR2B	P31323
2	5579	PRKCB	P05771
2	5582	PRKCG	P05129
2	55832	CAND1	Q86VP6
2	55847	CISD1	Q9NZ45
2	5592	PRKG1	Q13976
2	5594	MAPK1	P28482
2	55968	NSFL1C	Q9UNZ2
2	5599	MAPK8	P45983
2	5604	MAP2K1	Q02750
2	56106	PCDHGA10	Q9Y5H3
2	56134	PCDHAC2	Q9Y5I4
2	56141	PCDHA7	Q9UN72
2	5683	PSMA2	P25787
2	5688	PSMA7	O14818
2	5689	PSMB1	P20618
2	56890	MDM1	Q8TC05
2	56893	UBQLN4	Q9NRR5
2	56896	DPYSL5	Q9BPU6
2	5690	PSMB2	P49721
2	5692	PSMB4	P28070
2	5693	PSMB5	P28074
2	56952	PRTFDC1	Q9NRG1
2	56984	PSMG2	Q969U7
2	56998	CTNNBIP1	Q9NSA3
2	57154	SMURF1	Q9HCE7
2	57215	THAP11	Q96EK4
2	57369	GJD2	Q9UKL4
2	57405	SPC25	Q9HBM1
2	57452	GALNT16	Q8N428
2	57453	DSCAML1	Q8TD84
2	57559	STAMBPL1	Q96FJ0
2	57633	LRRN1	Q6UXK5
2	57633	LRRN1	Q6UXK5
2	57722	IGDCC4	Q8TDY8
2	5775	PTPN4	P29074
2	5781	PTPN11	Q06124
2	5781	PTPN11	Q06124
2	58191	CXCL16	Q9H2A7
2	5872	RAB13	P51153
2	5886	RAD23A	P54725
2	5887	RAD23B	P54727
2	5894	RAF1	P04049
2	5898	RALA	P11233
2	594855	CPLX3	Q8WVH0
2	5962	RDX	P35241
2	6000	RGS7	P49802
2	6001	RGS10	O43665
2	6035	RNASE1	P07998
2	6036	RNASE2	P10153
2	60401	EDA2R	Q9HAV5
2	60491	NIF3L1	Q9GZT8
2	60496	AASDHPPT	Q9NRN7
2	60682	SMAP1	Q8IYB5
2	6100	RP9	Q8TA86
2	6233	RPS27A	P62979
2	6233	RPS27A	P62979
2	6276	S100A5	P33763
2	63036	CELA2A	P08217
2	6327	SCN2B	O60939
2	6370	CCL25	O15444
2	6370	CCL25	O15444
2	63904	DUSP21	Q9H596
2	63908	NAPB	Q9H115
2	64093	SMOC1	Q9H4F8
2	64093	SMOC1	Q9H4F8
2	64094	SMOC2	Q9H3U7
2	64101	LRRC4	Q9HBW1
2	64115	VSIR	Q9H7M9
2	64115	VSIR	Q9H7M9
2	64130	LIN7B	Q9HAP6
2	64130	LIN7B	Q9HAP6
2	64130	LIN7B	Q9HAP6
2	6415	SELENOW	P63302
2	64168	NECAB1	Q8N987
2	6422	SFRP1	Q8N474
2	6422	SFRP1	Q8N474
2	64388	GREM2	Q9H772
2	6453	ITSN1	Q15811
2	6456	SH3GL2	Q99962
2	6456	SH3GL2	Q99962
2	64787	EPS8L2	Q9H6S3
2	65108	MARCKSL1	P49006
2	65264	UBE2Z	Q9H832
2	654790	PCP4L1	A6NKN8
2	65992	DDRGK1	Q96HY6
2	6612	SUMO3	P55854
2	6612	SUMO3	P55854
2	6613	SUMO2	P61956
2	6623	SNCG	O76070
2	6683	SPAST	Q9UBP0
2	6683	SPAST	Q9UBP0
2	6695	SPOCK1	Q08629
2	6695	SPOCK1	Q08629
2	6696	SPP1	P10451
2	6767	ST13	P50502
2	6770	STAR	P49675
2	6804	STX1A	Q16623
2	6804	STX1A	Q16623
2	6809	STX3	Q13277
2	6857	SYT1	P21579
2	6861	SYT5	O00445
2	6876	TAGLN	Q01995
2	6876	TAGLN	Q01995
2	6905	TBCE	Q15813
2	694	BTG1	P62324
2	7035	TFPI	P10646
2	7060	THBS4	P35443
2	7132	TNFRSF1A	P19438
2	7133	TNFRSF1B	P20333
2	7133	TNFRSF1B	P20333
2	7178	TPT1	P13693
2	7178	TPT1	P13693
2	7178	TPT1	P13693
2	7251	TSG101	Q99816
2	7265	TTC1	Q99614
2	728441	GGT2|GGT2P	P36268
2	728464	METTL24	Q5JXM2
2	7296	TXNRD1	Q16881
2	7323	UBE2D3	P61077
2	7323	UBE2D3	P61077
2	7324	UBE2E1	P51965
2	7328	UBE2H	P62256
2	7329	UBE2I	P63279
2	7334	UBE2N	P61088
2	7336	UBE2V2	Q15819
2	7345	UCHL1	P09936
2	7360	UGP2	Q16851
2	7369	UMOD	P07911
2	7389	UROD	P06132
2	7408	VASP	P50552
2	7430	EZR	P15311
2	7447	VSNL1	P62760
2	7447	VSNL1	P62760
2	7453	WARS1	P23381
2	7458	EIF4H	Q15056
2	7469	NELFA	Q9H3P2
2	7511	XPNPEP1	Q9NQW7
2	7529	YWHAB	P31946
2	7529	YWHAB	P31946
2	7531	YWHAE	P62258
2	7532	YWHAG	P61981
2	7532	YWHAG	P61981
2	7533	YWHAH	Q04917
2	7533	YWHAH	Q04917
2	7534	YWHAZ	P63104
2	78997	GDAP1L1	Q96MZ0
2	79017	GGCT	O75223
2	79068	FTO	Q9C0B1
2	79145	CHCHD7	Q9BUK0
2	7917	BAG6	P46379
2	79180	EFHD2	Q96C19
2	794	CALB2	P22676
2	79691	QTRT2	Q9H974
2	79694	MANEA	Q5SRI9
2	79713	IGFLR1	Q9H665
2	79719	AAGAB	Q6PD74
2	7980	TFPI2	P48307
2	79845	RNF122	Q9H9V4
2	79932	KIAA0319L	Q8IZA0
2	79982	DNAJB14	Q8TBM8
2	79982	DNAJB14	Q8TBM8
2	80150	ASRGL1	Q7L266
2	80301	PLEKHO2	Q8TD55
2	8050	PDHX	O00330
2	81	ACTN4	O43707
2	814	CAMK4	Q16566
2	81562	LMAN2L	Q9H0V9
2	816	CAMK2B	Q13554
2	81617	CAB39L	Q9H9S4
2	81621	KAZALD1	Q96I82
2	81621	KAZALD1	Q96I82
2	81631	MAP1LC3B	Q9GZQ8
2	817	CAMK2D	Q13557
2	8174	MADCAM1	Q13477
2	819	CAMLG	P49069
2	8226	PUDP	Q08623
2	826	CAPNS1	P04632
2	8266	UBL4A	P11441
2	8321	FZD1	Q9UP38
2	83442	SH3BGRL3	Q9H299
2	83638	C11orf68	Q9H3H3
2	83657	DYNLRB2	Q8TF09
2	83699	SH3BGRL2	Q9UJC5
2	83940	TATDN1	Q6P1N9
2	83988	NCALD	P61601
2	8407	TAGLN2	P37802
2	8407	TAGLN2	P37802
2	8417	STX7	O15400
2	84264	HAGHL	Q6PII5
2	84285	EIF1AD	Q8N9N8
2	84293	PRXL2A	Q9BRX8
2	84364	ARFGAP2	Q8N6H7
2	8440	NCK2	O43639
2	84457	PHYHIPL	Q96FC7
2	8447	DOC2B	Q14184
2	84525	HOPX	Q9BPY8
2	84557	MAP1LC3A	Q9H492
2	8460	TPST1	O60507
2	84632	AFAP1L2	Q8N4X5
2	84661	DPY30	Q9C005
2	84868	HAVCR2	Q8TDQ0
2	84868	HAVCR2	Q8TDQ0
2	84868	HAVCR2	Q8TDQ0
2	84892	POMGNT2	Q8NAT1
2	8498	RANBP3	Q9H6Z4
2	85012	TCEAL3	Q969E4
2	8522	GAS7	O60861
2	85479	DNAJC5B	Q9UF47
2	8572	PDLIM4	P50479
2	8649	LAMTOR3	Q9UHA4
2	8666	EIF3G	O75821
2	867	CBL	P22681
2	8682	PEA15	Q15121
2	873	CBR1	P16152
2	8754	ADAM9	Q13443
2	8825	LIN7A	O14910
2	8825	LIN7A	O14910
2	8880	FUBP1	Q96AE4
2	8904	CPNE1	Q99829
2	8904	CPNE1	Q99829
2	8925	HERC1	Q15751
2	89853	MVB12B	Q9H7P6
2	90268	OTULIN	Q96BN8
2	90313	TP53I13	Q8NBR0
2	9125	CNOT9	Q92600
2	9141	PDCD5	O14737
2	91683	SYT12	Q8IV01
2	9201	DCLK1	O15075
2	9209	LRRFIP2	Q9Y608
2	9218	VAPA	Q9P0L0
2	9241	NOG	Q13253
2	9241	NOG	Q13253
2	92675	DTD1	Q8TEA8
2	9289	ADGRG1	Q9Y653
2	9296	ATP6V1F	Q16864
2	9308	CD83	Q01151
2	9308	CD83	Q01151
2	93145	OLFM2	O95897
2	93145	OLFM2	O95897
2	93273	LEMD1	Q68G75
2	9352	TXNL1	O43396
2	9353	SLIT2	O94813
2	9377	COX5A	P20674
2	94056	SYAP1	Q96A49
2	94056	SYAP1	Q96A49
2	9413	FAM189A2	Q15884
2	9413	FAM189A2	Q15884
2	9423	NTN1	O95631
2	9423	NTN1	O95631
2	9447	AIM2	O14862
2	9456	HOMER1	Q86YM7
2	9456	HOMER1	Q86YM7
2	9482	STX8	Q9UNK0
2	953	ENTPD1	P49961
2	953	ENTPD1	P49961
2	9535	GMFG	O60234
2	9540	TP53I3	Q53FA7
2	9559	VPS26A	O75436
2	9588	PRDX6	P30041
2	9615	GDA	Q9Y2T3
2	9636	ISG15	P05161
2	9636	ISG15	P05161
2	9653	HS2ST1	Q7LGA3
2	967	CD63	P08962
2	967	CD63	P08962
2	968	CD68	P34810
2	968	CD68	P34810
2	9685	CLINT1	Q14677
2	97	ACYP1	P07311
2	976	ADGRE5	P48960
2	976	ADGRE5	P48960
2	9761	MLEC	Q14165
2	98	ACYP2	P14621
2	9813	EFCAB14	O75071
2	9813	EFCAB14	O75071
2	9861	PSMD6	Q15008
2	9863	MAGI2	Q86UL8
2	9908	G3BP2	Q9UN86
2	9920	KBTBD11	O94819
2	997	CDC34	P49427
3	10019	SH2B3	Q9UQQ2
3	100272147	CMC4	P56277
3	100303755	PET117	Q6UWS5
3	1005	CDH7	Q9ULB5
3	10076	PTPRU	Q92729
3	10090	UST	Q9Y2C2
3	10130	PDIA6	Q15084
3	10154	PLXNC1	O60486
3	10204	NUTF2	P61970
3	10228	STX6	O43752
3	10243	GPHN	Q9NQX3
3	10267	RAMP1	O60894
3	10317	B3GALT5	Q9Y2C3
3	1033	CDKN3	Q16667
3	10384	BTN3A3	O00478
3	10384	BTN3A3	O00478
3	10397	NDRG1	Q92597
3	10398	MYL9	P24844
3	10406	WFDC2	Q14508
3	10439	OLFM1	Q99784
3	10443	N4BP2L2	Q92802
3	10461	MERTK	Q12866
3	10461	MERTK	Q12866
3	10501	SEMA6B	Q9H3T3
3	10507	SEMA4D	Q92854
3	10519	CIB1	Q99828
3	10525	HYOU1	Q9Y4L1
3	10648	SCGB1D1	O95968
3	10678	B3GNT2	Q9NY97
3	10695	CNPY3	Q9BT09
3	10718	NRG3	P56975
3	10718	NRG3	P56975
3	10728	PTGES3	Q15185
3	10752	CHL1	O00533
3	10752	CHL1	O00533
3	10863	ADAM28	Q9UKQ2
3	10899	JTB	O76095
3	10905	MAN1A2	O60476
3	10938	EHD1	Q9H4M9
3	10959	TMED2	Q15363
3	10972	TMED10	P49755
3	1101	CHAD	O15335
3	11010	GLIPR1	P48060
3	11120	BTN2A1	Q7KYR7
3	1113	CHGA	P10645
3	1113	CHGA	P10645
3	1114	CHGB	P05060
3	11141	IL1RAPL1	Q9NZN1
3	11197	WIF1	Q9Y5W5
3	11197	WIF1	Q9Y5W5
3	11249	NXPH2	O95156
3	11253	MAN1B1	Q9UKM7
3	11261	CHP1	Q99653
3	11275	KLHL2	O95198
3	112849	L3HYPDH	Q96EM0
3	113802	HENMT1	Q5T8I9
3	114757	CYGB	Q8WWM9
3	114784	CSMD2	Q7Z408
3	114794	ELFN2	Q5R3F8
3	114795	TMEM132B	Q14DG7
3	114798	SLITRK1	Q96PX8
3	114798	SLITRK1	Q96PX8
3	114805	GALNT13	Q8IUC8
3	114815	SORCS1	Q8WY21
3	114900	C1QTNF4	Q9BXJ3
3	114900	C1QTNF4	Q9BXJ3
3	114900	C1QTNF4	Q9BXJ3
3	114990	VASN	Q6EMK4
3	115761	ARL11	Q969Q4
3	116135	LRRC3B	Q96PB8
3	116442	RAB39B	Q96DA2
3	121256	TMEM132D	Q14C87
3	124583	CANT1	Q8WVQ1
3	124857	WFIKKN2	Q8TEU8
3	124857	WFIKKN2	Q8TEU8
3	125	ADH1B	P00325
3	1264	CNN1	P51911
3	1271	CNTFR	P26992
3	1271	CNTFR	P26992
3	128240	NAXE	Q8NCW5
3	129684	CNTNAP5	Q8WYK1
3	129804	FBLN7	Q53RD9
3	1299	COL9A3	Q14050
3	135228	CD109	Q6YHK3
3	137970	UNC5D	Q6UXZ4
3	137970	UNC5D	Q6UXZ4
3	137970	UNC5D	Q6UXZ4
3	1388	ATF6B	Q99941
3	139065	SLITRK4	Q8IW52
3	140606	SELENOM	Q8WWX9
3	140689	CBLN4	Q9NTU7
3	140735	DYNLL2	Q96FJ2
3	140809	SRXN1	Q9BYN0
3	1436	CSF1R	P07333
3	1436	CSF1R	P07333
3	143903	LAYN	Q6UX15
3	144233	BCDIN3D	Q7Z5W3
3	145226	RDH12	Q96NR8
3	145581	LRFN5	Q96NI6
3	1463	NCAN	O14594
3	146760	RTN4RL1	Q86UN2
3	147381	CBLN2	Q8IUK8
3	148738	HJV	Q6ZVN8
3	151647	TAFA4	Q96LR4
3	151887	CCDC80	Q76M96
3	152002	XXYLT1	Q8NBI6
3	152330	CNTN4	Q8IWV2
3	154064	RAET1L	Q5VY80
3	154064	RAET1L	Q5VY80
3	154790	CLEC2L	P0C7M8
3	158326	FREM1	Q5H8C1
3	1604	CD55	P08174
3	161357	MDGA2	Q7Z553
3	163	AP2B1	P63010
3	1630	DCC	P43146
3	1636	ACE	P12821
3	1650	DDOST	P39656
3	165257	C1QL2	Q7Z5L3
3	165257	C1QL2	Q7Z5L3
3	169714	QSOX2	Q6ZRP7
3	171483	FAM9B	Q8IZU0
3	1738	DLD	P09622
3	1738	DLD	P09622
3	1759	DNM1	Q05193
3	1785	DNM2	P50570
3	182	JAG1	P78504
3	182	JAG1	P78504
3	1824	DSC2	Q02487
3	1826	DSCAM	O60469
3	1893	ECM1	Q16610
3	1944	EFNA3	P52797
3	1944	EFNA3	P52797
3	1946	EFNA5	P52803
3	1950	EGF	P01133
3	1950	EGF	P01133
3	196500	PIANP	Q8IYJ0
3	196500	PIANP	Q8IYJ0
3	1979	EIF4EBP2	Q13542
3	1979	EIF4EBP2	Q13542
3	2005	ELK4	P28324
3	202052	DNAJC18	Q9H819
3	2043	EPHA4	P54764
3	2043	EPHA4	P54764
3	2044	EPHA5	P54756
3	2045	EPHA7	Q15375
3	2045	EPHA7	Q15375
3	2047	EPHB1	P54762
3	2048	EPHB2	P29323
3	2048	EPHB2	P29323
3	2049	EPHB3	P54753
3	2050	EPHB4	P54760
3	2051	EPHB6	O15197
3	2051	EPHB6	O15197
3	2135	EXTL2	Q9UBQ6
3	214	ALCAM	Q13740
3	219699	UNC5B	Q8IZJ1
3	219699	UNC5B	Q8IZJ1
3	219699	UNC5B	Q8IZJ1
3	2260	FGFR1	P11362
3	22827	PUF60	Q9UHX1
3	22854	NTNG1	Q9Y2I2
3	22865	SLITRK3	O94933
3	22871	NLGN1	Q8N2Q7
3	22871	NLGN1	Q8N2Q7
3	22871	NLGN1	Q8N2Q7
3	22883	CLSTN1	O94985
3	22926	ATF6	P18850
3	22986	SORCS3	Q9UPU3
3	22986	SORCS3	Q9UPU3
3	230	ALDOC	P09972
3	230	ALDOC	P09972
3	23071	ERP44	Q9BS26
3	23105	FSTL4	Q6MZW2
3	23114	NFASC	O94856
3	23129	PLXND1	Q9Y4D7
3	23284	ADGRL3	Q9HAR2
3	23308	ICOSLG	O75144
3	23308	ICOSLG	O75144
3	2335	FN1	P02751
3	2335	FN1	P02751
3	2335	FN1	P02751
3	2335	FN1	P02751
3	23380	SRGAP2	O75044
3	23406	COTL1	Q14019
3	23467	NPTXR	O95502
3	23467	NPTXR	O95502
3	2350	FOLR2	P14207
3	23543	RBFOX2	O43251
3	23544	SEZ6L	Q9BYH1
3	23558	WBP2	Q969T9
3	23630	KCNE5	Q9UJ90
3	23630	KCNE5	Q9UJ90
3	23673	STX12	Q86Y82
3	23705	CADM1	Q9BY67
3	23767	FLRT3	Q9NZU0
3	23767	FLRT3	Q9NZU0
3	245812	CNPY4	Q8N129
3	245812	CNPY4	Q8N129
3	2495	FTH1	P02794
3	2524	FUT2	Q10981
3	2530	FUT8	Q9BYC5
3	2535	FZD2	Q14332
3	2535	FZD2	Q14332
3	253559	CADM2	Q8N3J6
3	2571	GAD1	Q99259
3	257106	ARHGAP30	Q7Z6I6
3	257194	NEGR1	Q7Z3B1
3	257194	NEGR1	Q7Z3B1
3	25758	KIAA1549L	Q6ZVL6
3	25789	TMEM59L	Q9UK28
3	25797	QPCT	Q16769
3	258010	SVIP	Q8NHG7
3	25817	TAFA5	Q7Z5A7
3	2583	B4GALNT1	Q00973
3	25834	MGAT4C	Q9UBM8
3	25884	CHRDL2	Q6WN34
3	2589	GALNT1	Q10472
3	2590	GALNT2	Q10471
3	25932	CLIC4	Q9Y696
3	25932	CLIC4	Q9Y696
3	26011	TENM4	Q6N022
3	26045	LRRTM2	O43300
3	26047	CNTNAP2	Q9UHC6
3	26050	SLITRK5	O94991
3	2619	GAS1	P54826
3	2621	GAS6	Q14393
3	26229	B3GAT3	O94766
3	2648	KAT2A	Q92830
3	2648	KAT2A	Q92830
3	266722	HS6ST3	Q8IZP7
3	266727	MDGA1	Q8NFP4
3	2675	GFRA2	O00451
3	2687	GGT5	P36269
3	27020	NPTN	Q9Y639
3	27087	B3GAT1	Q9P2W7
3	27122	DKK3	Q9UBP4
3	27122	DKK3	Q9UBP4
3	27242	TNFRSF21	O75509
3	27242	TNFRSF21	O75509
3	27248	ERLEC1	Q96DZ1
3	27255	CNTN6	Q9UQ52
3	27344	PCSK1N	Q9UHG2
3	27429	HTRA2	O43464
3	2760	GM2A	P17900
3	283635	FAM177A1	Q8N128
3	283820	NOMO2	Q5JPE7
3	284184	NDUFAF8	A1L188
3	284361	EMC10	Q5UCC4
3	284422	SMIM24	O75264
3	284656	EPHA10	Q5JZY3
3	284656	EPHA10	Q5JZY3
3	28512	NKIRAS1	Q9NYS0
3	28514	DLL1	O00548
3	28514	DLL1	O00548
3	285220	EPHA6	Q9UF33
3	285704	RGMB	Q6NW40
3	2861	GPR37	O15354
3	2885	GRB2	P62993
3	2893	GRIA4	P48058
3	2895	GRID2	O43424
3	29071	C1GALT1C1	Q96EU7
3	29091	STXBP6	Q8NFX7
3	29094	LGALSL	Q3ZCW2
3	29126	CD274	Q9NZQ7
3	2923	PDIA3	P30101
3	2923	PDIA3	P30101
3	29916	SNX11	Q9Y5W9
3	29967	LRP12	Q9Y561
3	29967	LRP12	Q9Y561
3	3046	HBE1	P02100
3	3046	HBE1	P02100
3	30845	EHD3	Q9NZN3
3	30851	TAX1BP3	O14907
3	3098	HK1	P19367
3	3135	HLA-G	P17693
3	329	BIRC2	Q13490
3	329	BIRC2	Q13490
3	3313	HSPA9	P38646
3	3321	IGSF3	O75054
3	3321	IGSF3	O75054
3	333	APLP1	P51693
3	334	APLP2	Q06481
3	334	APLP2	Q06481
3	3340	NDST1	P52848
3	336	APOA2	P02652
3	340706	VWA2	Q5GFL6
3	3423	IDS	P22304
3	343637	RSPO4	Q2I0M5
3	3459	IFNGR1	P15260
3	347902	AMIGO2	Q86SJ2
3	347902	AMIGO2	Q86SJ2
3	3551	IKBKB	O14920
3	3570	IL6R	P08887
3	3570	IL6R	P08887
3	3570	IL6R	P08887
3	3572	IL6ST	P40189
3	3590	IL11RA	Q14626
3	3590	IL11RA	Q14626
3	3643	INSR	P06213
3	3705	ITPK1	Q13572
3	375567	VWC2	Q2TAL6
3	375567	VWC2	Q2TAL6
3	379	ARL4D	P49703
3	3815	KIT	P10721
3	389941	C1QL3	Q5VWW1
3	394	ARHGAP5	Q13017
3	399947	C11orf87	Q6NUJ2
3	400569	MED11	Q9P086
3	400831	C20orf202	A1L168
3	400916	CHCHD10	Q8WYQ3
3	402117	VWC2L	B2RUY7
3	4023	LPL	P06858
3	402665	IGLON5	A6NGN9
3	4036	LRP2	P98164
3	4038	LRP4	O75096
3	4040	LRP6	O75581
3	404037	HAPLN4	Q86UW8
3	4045	LSAMP	Q13449
3	4059	BCAM	P50895
3	4162	MCAM	P43121
3	4179	CD46	P15529
3	4185	ADAM11	O75078
3	419	ART3	Q13508
3	419	ART3	Q13508
3	4191	MDH2	P40926
3	4191	MDH2	P40926
3	4191	MDH2	P40926
3	4233	MET	P08581
3	4233	MET	P08581
3	4240	MFGE8	Q08431
3	4240	MFGE8	Q08431
3	4247	MGAT2	Q10469
3	4248	MGAT3	Q09327
3	4249	MGAT5	Q09328
3	4249	MGAT5	Q09328
3	433	ASGR2	P07307
3	4340	MOG	Q16653
3	4345	CD200	P41217
3	4357	MPST	P25325
3	4360	MRC1	P22897
3	440574	MICOS10	Q5TGZ0
3	4684	NCAM1	P13591
3	4684	NCAM1	P13591
3	4685	NCAM2	O15394
3	4685	NCAM2	O15394
3	4729	NDUFV2	P19404
3	4745	NELL1	Q92832
3	4756	NEO1	Q92859
3	481	ATP1B1	P05026
3	4851	NOTCH1	P46531
3	4854	NOTCH3	Q9UM47
3	4880	NPPC	P23582
3	4884	NPTX1	Q15818
3	4885	NPTX2	P47972
3	4897	NRCAM	Q92823
3	4915	NTRK2	Q16620
3	4916	NTRK3	Q16288
3	4919	ROR1	Q01973
3	4919	ROR1	Q01973
3	4920	ROR2	Q01974
3	4921	DDR2	Q16832
3	4921	DDR2	Q16832
3	4925	NUCB2	P80303
3	4978	OPCML	Q14982
3	4978	OPCML	Q14982
3	5052	PRDX1	Q06830
3	5055	SERPINB2	P05120
3	50632	CALY	Q9NYX4
3	5064	PALM	O75781
3	5066	PAM	P19021
3	5066	PAM	P19021
3	5067	CNTN3	Q9P232
3	50863	NTM	Q9P121
3	50863	NTM	Q9P121
3	50863	NTM	Q9P121
3	50937	CDON	Q4KMG0
3	5097	PCDH1	Q08174
3	5101	PCDH9	Q9HC56
3	51022	GLRX2	Q9NS18
3	51078	THAP4	Q8WY91
3	51115	RMDN1	Q96DB5
3	51172	NAGPA	Q9UK23
3	51191	HERC5	Q9UII4
3	5122	PCSK1	P29120
3	51234	EMC4	Q5J8M3
3	5126	PCSK2	P16519
3	51293	CD320	Q9NPF0
3	51379	CRLF3	Q8IUI8
3	51384	WNT16	Q9UBV4
3	51384	WNT16	Q9UBV4
3	51504	TRMT112	Q9UI30
3	51552	RAB14	P61106
3	51557	LGSN	Q5TDP6
3	5156	PDGFRA	P16234
3	51560	RAB6B	Q9NRW1
3	51569	UFM1	P61960
3	51596	CUTA	O60888
3	51726	DNAJB11	Q9UBS4
3	5213	PFKM	P08237
3	5236	PGM1	P36871
3	5239	PGM5	Q15124
3	5241	PGR	P06401
3	5361	PLXNA1	Q9UIW2
3	53616	ADAM22	Q9P0K1
3	53833	IL20RB	Q6UXL0
3	53917	RAB24	Q969Q5
3	53942	CNTN5	O94779
3	5412	UBL3	O95164
3	54165	DCUN1D1	Q96GG9
3	54205	CYCS	P99999
3	5440	POLR2K	P53803
3	5443	POMC	P01189
3	5443	POMC	P01189
3	5443	POMC	P01189
3	54431	DNAJC10	Q8IXB1
3	54437	SEMA5B	Q9P283
3	5447	POR	P16435
3	54472	TOLLIP	Q9H0E2
3	54495	TMX3	Q96JJ7
3	54504	CPVL	Q9H3G5
3	54567	DLL4	Q9NR61
3	54664	TMEM106B	Q9NUM4
3	54682	MANSC1	Q9H8J5
3	54732	TMED9	Q9BVK6
3	54788	DNAJB12	Q9NXW2
3	54814	QPCTL	Q9NXS2
3	54829	ASPN	Q9BXN1
3	54873	PALMD	Q9NP74
3	54928	BPNT2	Q9NX62
3	54972	TMEM132A	Q24JP5
3	54997	TESC	Q96BS2
3	5501	PPP1CC	P36873
3	55033	FKBP14	Q9NWM8
3	5504	PPP1R2	P41236
3	5504	PPP1R2	P41236
3	55118	CRTAC1	Q9NQ79
3	55151	TMEM38B	Q9NVV0
3	553115	PEF1	Q9UBV8
3	5550	PREP	P48147
3	55501	CHST12	Q9NRB3
3	55554	KLK15	Q9H2R5
3	55696	RBM22	Q9NW64
3	55752	SEPTIN11	Q9NVA2
3	55799	CACNA2D3	Q8IZS8
3	55800	SCN3B	Q9NY72
3	55861	DBNDD2	Q9BQY9
3	5589	PRKCSH	P14314
3	55901	THSD1	Q9NS62
3	55959	SULF2	Q8IWU5
3	55997	CFC1	P0CG37
3	56005	MYDGF	Q969H8
3	5602	MAPK10	P53779
3	56261	GPCPD1	Q9NPB8
3	5649	RELN	P78509
3	56647	BCCIP	Q9P287
3	56884	FSTL5	Q8N475
3	5691	PSMB3	P49720
3	56920	SEMA3G	Q9NS98
3	56934	CA10	Q9NS85
3	56934	CA10	Q9NS85
3	56963	RGMA	Q96B86
3	56975	FAM20C	Q8IXL6
3	56975	FAM20C	Q8IXL6
3	5699	PSMB10	P40306
3	57026	PDXP	Q96GD0
3	57045	TWSG1	Q9GZX9
3	57124	CD248	Q9HCU0
3	57125	PLXDC1	Q8IUK5
3	57134	MAN1C1	Q9NR34
3	57184	FAM219B	Q5XKK7
3	5738	PTGFRN	Q9P2B2
3	57403	RAB22A	Q9UL26
3	57446	NDRG3	Q9UGV2
3	57447	NDRG2	Q9UN36
3	57497	LRFN2	Q9ULH4
3	575	ADGRB1	O14514
3	57502	NLGN4X	Q8N0W4
3	57555	NLGN2	Q8NFZ4
3	57555	NLGN2	Q8NFZ4
3	57556	SEMA6A	Q9H2E6
3	57556	SEMA6A	Q9H2E6
3	576	ADGRB2	O60241
3	57611	ISLR2	Q6UXK2
3	57611	ISLR2	Q6UXK2
3	57613	FAM234B	A2RU67
3	57613	FAM234B	A2RU67
3	5768	QSOX1	O00391
3	5768	QSOX1	O00391
3	57689	LRRC4C	Q9HCJ2
3	57689	LRRC4C	Q9HCJ2
3	577	ADGRB3	O60242
3	57715	SEMA4G	Q9NTN9
3	57763	ANKRA2	Q9H9E1
3	57863	CADM3	Q8N126
3	5789	PTPRD	P23468
3	5795	PTPRJ	Q12913
3	5801	PTPRR	Q15256
3	5802	PTPRS	Q13332
3	58189	WFDC1	Q9HC57
3	5819	NECTIN2	Q92692
3	58473	PLEKHB1	Q9UF11
3	58494	JAM2	P57087
3	58513	EPS15L1	Q9UBC2
3	5861	RAB1A	P62820
3	590	BCHE	P06276
3	590	BCHE	P06276
3	59084	ENPP5	Q9UJA9
3	59274	TLNRD1	Q9H1K6
3	59277	NTN4	Q9HB63
3	5947	RBP1	P09455
3	5947	RBP1	P09455
3	5986	RFNG	Q9Y644
3	6091	ROBO1	Q9Y6N7
3	6092	ROBO2	Q9HCK4
3	6092	ROBO2	Q9HCK4
3	637	BID	P55957
3	6396	SEC13	P55735
3	64084	CLSTN2	Q9H4D0
3	64089	SNX16	P57768
3	64218	SEMA4A	Q9H3S1
3	642968	FAM163B	P0C2L3
3	643847	PGA4	P0DJD7
3	64399	HHIP	Q96QV1
3	6447	SCG5	P05408
3	64478	CSMD1	Q96PZ7
3	645191	LINGO3	P0C6S8
3	64841	GNPNAT1	Q96EK6
3	65009	NDRG4	Q9ULP0
3	65078	RTN4R	Q9BZR6
3	653	BMP5	P22003
3	654	BMP6	P22004
3	654	BMP6	P22004
3	654429	LRTM2	Q8N967
3	6585	SLIT1	O75093
3	659	BMPR2	Q13873
3	65989	DLK2	Q6UY11
3	6624	FSCN1	Q16658
3	6648	SOD2	P04179
3	665	BNIP3L	O60238
3	6750	SST	P61278
3	6780	STAU1	O95793
3	682	BSG	P35613
3	6821	SUOX	P51687
3	6834	SURF1	Q15526
3	686	BTD	P43251
3	686	BTD	P43251
3	6860	SYT4	Q9H2B2
3	687	KLF9	Q13886
3	6903	TBCC	Q15814
3	7049	TGFBR3	Q03167
3	7075	TIE1	P35590
3	7078	TIMP3	P35625
3	7079	TIMP4	Q99727
3	7086	TKT	P29401
3	7087	ICAM5	Q9UMF0
3	7087	ICAM5	Q9UMF0
3	7087	ICAM5	Q9UMF0
3	7123	CLEC3B	P05452
3	7143	TNR	Q92752
3	716	C1S	P09871
3	716	C1S	P09871
3	7167	TPI1	P60174
3	7184	HSP90B1	P14625
3	729447	GAGE2A	Q6NT46
3	729920	CRPPA	A4D126
3	7301	TYRO3	Q06418
3	7301	TYRO3	Q06418
3	7316	UBC	P0CG48
3	7316	UBC	P0CG48
3	7322	UBE2D2	P62837
3	7432	VIP	P01282
3	7450	VWF	P04275
3	770	CA11	O75493
3	7804	LRP8	Q14114
3	784	CACNB3	P54284
3	785	CACNB4	O00305
3	7855	FZD5	Q13467
3	7873	MANF	P55145
3	7873	MANF	P55145
3	78987	CRELD1	Q96HD1
3	78999	LRFN4	Q6PJG9
3	79415	CYBC1	Q9BQA9
3	79623	GALNT14	Q96FL9
3	79987	SVEP1	Q4LDE5
3	79987	SVEP1	Q4LDE5
3	80031	SEMA6D	Q8NFY4
3	80303	EFHD1	Q9BUP0
3	80328	ULBP2	Q9BZM5
3	80328	ULBP2	Q9BZM5
3	80347	COASY	Q13057
3	8048	CSRP3	P50461
3	80781	COL18A1	P39060
3	8128	ST8SIA2	Q92186
3	81567	TXNDC5	Q8NBS9
3	81831	NETO2	Q8NC67
3	81832	NETO1	Q8TDF5
3	81832	NETO1	Q8TDF5
3	81849	ST6GALNAC5	Q9BVH7
3	81928	CABLES2	Q9BTV7
3	824	CAPN2	P17655
3	831	CAST	P20810
3	8324	FZD7	O75084
3	8325	FZD8	Q9H461
3	8326	FZD9	O00144
3	83543	AIF1L	Q9BQI0
3	83700	JAM3	Q9BX67
3	83715	ESPN	B1AK53
3	83886	PRSS27	Q9BQR3
3	83886	PRSS27	Q9BQR3
3	83999	KREMEN1	Q96MU8
3	83999	KREMEN1	Q96MU8
3	84063	KIRREL2	Q6UWL6
3	84063	KIRREL2	Q6UWL6
3	84064	HDHD2	Q9H0R4
3	84193	SETD3	Q86TU7
3	84197	POMK	Q9H5K3
3	84263	HSDL2	Q6YN16
3	84309	NUDT16L1	Q9BRJ7
3	84335	AKT1S1	Q96B36
3	8450	CUL4B	Q13620
3	8459	TPST2	O60704
3	84623	KIRREL3	Q8IZU9
3	84631	SLITRK2	Q9H156
3	84735	CNDP1	Q96KN2
3	84735	CNDP1	Q96KN2
3	84750	FUT10	Q6P4F1
3	84869	CBR4	Q8N4T8
3	84870	RSPO3	Q9BXY4
3	84870	RSPO3	Q9BXY4
3	84894	LINGO1	Q96FE5
3	84918	LRP11	Q86VZ4
3	84918	LRP11	Q86VZ4
3	84918	LRP11	Q86VZ4
3	84957	RELT	Q969Z4
3	84957	RELT	Q969Z4
3	85002	FAM86B1	Q8N7N1
3	8534	CHST1	O43916
3	8578	SCARF1	Q14162
3	8633	UNC5C	O95185
3	8646	CHRD	Q9H2X0
3	8704	B4GALT2	O60909
3	8707	B3GALT2	O43825
3	8738	CRADD	P78560
3	8745	ADAM23	O75077
3	8764	TNFRSF14	Q92956
3	8764	TNFRSF14	Q92956
3	8764	TNFRSF14	Q92956
3	8792	TNFRSF11A	Q9Y6Q6
3	8828	NRP2	O60462
3	8828	NRP2	O60462
3	8829	NRP1	O14786
3	8829	NRP1	O14786
3	885	CCK	P06307
3	8887	TAX1BP1	Q86VP1
3	8974	P4HA2	O15460
3	8994	LIMD1	Q9UGP4
3	90121	TSR2	Q969E8
3	9019	MPZL1	O95297
3	9024	BRSK2	Q8IWQ3
3	90249	UNC5A	Q6ZN44
3	9025	RNF8	O76064
3	90952	ESAM	Q96AP7
3	90952	ESAM	Q96AP7
3	90952	ESAM	Q96AP7
3	9146	HGS	O14964
3	91584	PLXNA4	Q9HCM2
3	92	ACVR2A	P27037
3	9215	LARGE1	O95461
3	92291	CAPN13	Q6MZZ7
3	9236	CCPG1	Q9ULG6
3	9242	MSC	O60682
3	929	CD14	P08571
3	929	CD14	P08571
3	93185	IGSF8	Q969P0
3	9331	B4GALT6	Q9UBX8
3	9332	CD163	Q86VB7
3	9369	NRXN3	Q9Y4C0
3	9369	NRXN3	Q9HDB5
3	9378	NRXN1	P58400
3	9378	NRXN1	P58400
3	9378	NRXN1	Q9ULB1
3	9394	HS6ST1	O60243
3	94032	CAMK2N2	Q96S95
3	944	TNFSF8	P32971
3	9466	IL27RA	Q6UWB1
3	9486	CHST10	O43529
3	9532	BAG2	O95816
3	955	ENTPD6	O75354
3	9562	MINPP1	Q9UNW1
3	9562	MINPP1	Q9UNW1
3	9589	WTAP	Q15007
3	9639	ARHGEF10	O15013
3	9647	PPM1F	P49593
3	9672	SDC3	O75056
3	9719	ADAMTSL2	Q86TH1
3	9768	PCLAF	Q15004
3	9900	SV2A	Q7L0J3
3	9902	MRC2	Q9UBG0
3	9910	RABGAP1L	Q5R372
3	9910	RABGAP1L	B7ZAP0
3	9917	FAM20B	O75063
3	994	CDC25B	P30305
4	101180976	IFNL4	K9M1U5
4	10205	MPZL2	O60487
4	10217	CTDSPL	O15194
4	10229	COQ7	Q99807
4	10278	EFS	O43281
4	10352	WARS2	Q9UGM6
4	10371	SEMA3A	Q14563
4	10428	CFDP1	Q9UEE9
4	10468	FST	P19883
4	1050	CEBPA	P49715
4	10589	DRAP1	Q14919
4	1070	CETN3	O15182
4	10768	AHCYL1	O43865
4	10954	PDIA5	Q14554
4	10981	RAB32	Q13637
4	11067	DEPP1	Q9NTK1
4	11335	CBX3	Q13185
4	115362	GBP5	Q96PP8
4	115827	RAB3C	Q96E17
4	117145	THEM4	Q5T1C6
4	117157	SH2D1B	O14796
4	1179	CLCA1	A8K7I4
4	1213	CLTC	Q00610
4	1215	CMA1	P23946
4	138715	ARID3C	A6NKF2
4	140838	NANP	Q8TBE9
4	1509	CTSD	P07339
4	151636	DTX3L	Q8TDB6
4	1611	DAP	P51397
4	1612	DAPK1	P53355
4	164656	TMPRSS6	Q8IU80
4	1659	DHX8	Q14562
4	1848	DUSP6	Q16828
4	196383	RILPL2	Q969X0
4	203413	CT83	Q5H943
4	2116	ETV2	O00321
4	221	ALDH3B1	P43353
4	2250	FGF5	P12034
4	2268	FGR	P09769
4	22808	MRAS	O14807
4	22882	ZHX2	Q9Y6X8
4	22944	KIN	O60870
4	2305	FOXM1	Q08050
4	2309	FOXO3	O43524
4	23157	SEPTIN6	Q14141
4	23173	METAP1	P53582
4	24139	EML2	O95834
4	245913	DEFB110	Q30KQ9
4	256394	SERPINA11	Q86U17
4	25804	LSM4	Q9Y4Z0
4	26205	GMEB2	Q9UKD1
4	26525	IL36RN	Q9UBH0
4	2661	GDF9	O60383
4	27236	ARFIP1	P53367
4	27299	ADAMDEC1	O15204
4	27302	BMP10	O95393
4	282973	JAKMIP3	Q5VZ66
4	29121	CLEC2D	Q9UHP7
4	2963	GTF2F2	P13984
4	29761	USP25	Q9UHP3
4	30014	SPANXA1	Q9NS26
4	30820	KCNIP1	Q9NZI2
4	3148	HMGB2	P26583
4	3148	HMGB2	P26583
4	326624	RAB37	Q96AX2
4	3363	HTR7	P34969
4	3385	ICAM3	P32942
4	343413	FCRL6	Q6DN72
4	3553	IL1B	P01584
4	3852	KRT5	P13647
4	3933	LCN1	P31025
4	3976	LIF	P15018
4	3976	LIF	P15018
4	400668	PRSS57	Q6UWY2
4	432	ASGR1	P07306
4	4914	NTRK1	P04629
4	4928	NUP98	P52948
4	493856	CISD2	Q8N5K1
4	5013	OTX1	P32242
4	5105	PCK1	P35558
4	51052	PRLH	P81277
4	51378	ANGPT4	Q9Y264
4	51465	UBE2J1	Q9Y385
4	51538	ZCCHC17	Q9NP64
4	51639	SF3B6	Q9Y3B4
4	5170	PDPK1	O15530
4	5295	PIK3R1	P27986
4	53938	PPIL3	Q9H2H8
4	5423	POLB	P06746
4	54583	EGLN1	Q9GZT9
4	54921	CHTF8	P0CG13
4	55192	DNAJC17	Q9NVM6
4	55576	STAB2	Q8WWQ8
4	55775	TDP1	Q9NUW8
4	5588	PRKCQ	Q04759
4	56113	PCDHGA2	Q9Y5H1
4	5670	PSG2	P11465
4	57097	PARP11	Q9NR21
4	57716	PRX	Q9BXM0
4	5806	PTX3	P26022
4	58490	RPRD1B	Q9NQG5
4	5925	RB1	P06400
4	5929	RBBP5	Q15291
4	5996	RGS1	Q08116
4	5999	RGS4	P49798
4	5999	RGS4	P49798
4	60676	PAPPA2	Q9BXP8
4	6096	RORB	Q92753
4	6201	RPS7	P62081
4	6345	SRL	Q86TD4
4	64422	ATG3	Q9NT62
4	6480	ST6GAL1	P15907
4	64978	MRPL38	Q96DV4
4	6500	SKP1	P63208
4	6817	SULT1A1	P50225
4	7140	TNNT3	P45378
4	7150	TOP1	P11387
4	7173	TPO	P07202
4	7249	TSC2	P49815
4	79625	NDNF	Q8TB73
4	80765	STARD5	Q9NSY2
4	80774	LIMD2	Q9BT23
4	80790	CMIP	Q8IY22
4	8085	KMT2D	O14686
4	8091	HMGA2	P52926
4	83416	FCRL5	Q96RD9
4	83483	PLVAP	Q9BX97
4	83758	RBP5	P82980
4	8379	MAD1L1	Q9Y6D9
4	84247	RTL6	Q6ICC9
4	84461	NEURL4	Q96JN8
4	84959	UBASH3B	Q8TF42
4	84991	RBM17	Q96I25
4	8517	IKBKG	Q9Y6K9
4	8518	ELP1	O95163
4	85377	MICALL1	Q8N3F8
4	85480	TSLP	Q969D9
4	8823	FGF16	O43320
4	8823	FGF16	O43320
4	8896	BUD31	P41223
4	8915	BCL10	O95999
4	8930	MBD4	O95243
4	90231	KIAA2013	Q8IYS2
4	9049	AIP	O00170
4	9138	ARHGEF1	Q92888
4	92241	RCSD1	Q6JBY9
4	933	CD22	P20273
4	9422	ZNF264	O43296
4	9467	SH3BP5	O60239
4	9474	ATG5	Q9H1Y0
4	972	CD74	P04233
4	972	CD74	P04233
4	9848	MFAP3L	O75121
4	9984	THOC1	Q96FV9
