# Supplementary material
Source: Research Square preprint supplement (doi:10.21203/rs.3.rs-8960775/v1)
Supplement: Supplementary file 3 [file b3a79d76abcbcd86df28e1f6.xlsx]

## Sheet: Sheet 1
EntrezGeneID	Delta	EntrezGeneSymbol	UniProt
2116	0.546227	ETV2	O00321
51465	0.444345	UBE2J1	Q9Y385
9474	0.42066	ATG5	Q9H1Y0
282973	0.41588	JAKMIP3	Q5VZ66
83416	0.396176	FCRL5	Q96RD9
51538	0.384935	ZCCHC17	Q9NP64
29121	0.384083	CLEC2D	Q9UHP7
7140	0.381332	TNNT3	P45378
1070	0.366738	CETN3	O15182
84461	0.365855	NEURL4	Q96JN8
5013	0.361078	OTX1	P32242
7249	0.35801	TSC2	P49815
196383	0.356088	RILPL2	Q969X0
9848	0.354127	MFAP3L	O75121
972	0.35254	CD74	P04233
972	0.35254	CD74	P04233
1179	0.351132	CLCA1	A8K7I4
30820	0.348995	KCNIP1	Q9NZI2
326624	0.343914	RAB37	Q96AX2
432	0.342952	ASGR1	P07306
8085	0.342809	KMT2D	O14686
101180976	0.341475	IFNL4	K9M1U5
3852	0.33902	KRT5	P13647
4928	0.33508	NUP98	P52948
53938	0.334685	PPIL3	Q9H2H8
9422	0.330422	ZNF264	O43296
8517	0.320186	IKBKG	Q9Y6K9
84991	0.318814	RBM17	Q96I25
5925	0.3185	RB1	P06400
117157	0.316922	SH2D1B	O14796
138715	0.315673	ARID3C	A6NKF2
30014	0.314497	SPANXA1	Q9NS26
8930	0.313492	MBD4	O95243
55192	0.311242	DNAJC17	Q9NVM6
92241	0.307992	RCSD1	Q6JBY9
84247	0.306771	RTL6	Q6ICC9
3553	0.304864	IL1B	P01584
10954	0.304593	PDIA5	Q14554
6345	0.303549	SRL	Q86TD4
1848	0.302551	DUSP6	Q16828
85377	0.302095	MICALL1	Q8N3F8
10768	0.30025	AHCYL1	O43865
117145	0.30016	THEM4	Q5T1C6
55576	0.298011	STAB2	Q8WWQ8
29761	0.295475	USP25	Q9UHP3
7150	0.290907	TOP1	P11387
164656	0.288094	TMPRSS6	Q8IU80
22882	0.287251	ZHX2	Q9Y6X8
10217	0.285441	CTDSPL	O15194
6096	0.285206	RORB	Q92753
54921	0.285194	CHTF8	P0CG13
8091	0.284479	HMGA2	P52926
5806	0.282758	PTX3	P26022
2309	0.281144	FOXO3	O43524
1050	0.280714	CEBPA	P49715
80774	0.280597	LIMD2	Q9BT23
8379	0.27949	MAD1L1	Q9Y6D9
5170	0.277518	PDPK1	O15530
11335	0.277098	CBX3	Q13185
51052	0.276354	PRLH	P81277
256394	0.276308	SERPINA11	Q86U17
26525	0.27578	IL36RN	Q9UBH0
8518	0.27496	ELP1	O95163
79625	0.274718	NDNF	Q8TB73
27236	0.274143	ARFIP1	P53367
2268	0.273694	FGR	P09769
23173	0.273524	METAP1	P53582
2305	0.270585	FOXM1	Q08050
115362	0.270553	GBP5	Q96PP8
10981	0.267138	RAB32	Q13637
83483	0.266064	PLVAP	Q9BX97
51639	0.263429	SF3B6	Q9Y3B4
60676	0.262227	PAPPA2	Q9BXP8
10278	0.260087	EFS	O43281
9049	0.258137	AIP	O00170
83758	0.258093	RBP5	P82980
3385	0.253945	ICAM3	P32942
5295	0.252837	PIK3R1	P27986
23157	0.25273	SEPTIN6	Q14141
1213	0.251566	CLTC	Q00610
203413	0.251385	CT83	Q5H943
151636	0.247394	DTX3L	Q8TDB6
1659	0.243159	DHX8	Q14562
11067	0.242608	DEPP1	Q9NTK1
10428	0.24239	CFDP1	Q9UEE9
5588	0.241577	PRKCQ	Q04759
5996	0.239468	RGS1	Q08116
2250	0.238858	FGF5	P12034
64422	0.238743	ATG3	Q9NT62
10589	0.237753	DRAP1	Q14919
2963	0.237083	GTF2F2	P13984
56113	0.236591	PCDHGA2	Q9Y5H1
10371	0.235622	SEMA3A	Q14563
27302	0.234479	BMP10	O95393
5929	0.233229	RBBP5	Q15291
493856	0.228884	CISD2	Q8N5K1
80790	0.227325	CMIP	Q8IY22
58490	0.225527	RPRD1B	Q9NQG5
140838	0.224623	NANP	Q8TBE9
6480	0.222772	ST6GAL1	P15907
80765	0.220391	STARD5	Q9NSY2
22808	0.219685	MRAS	O14807
7173	0.217966	TPO	P07202
5670	0.217324	PSG2	P11465
3148	0.217241	HMGB2	P26583
3148	0.217241	HMGB2	P26583
3976	0.216704	LIF	P15018
3976	0.216704	LIF	P15018
10229	0.215613	COQ7	Q99807
85480	0.212695	TSLP	Q969D9
1611	0.21156	DAP	P51397
57716	0.211072	PRX	Q9BXM0
27299	0.209209	ADAMDEC1	O15204
10352	0.207819	WARS2	Q9UGM6
54583	0.206703	EGLN1	Q9GZT9
400668	0.205974	PRSS57	Q6UWY2
9138	0.20541	ARHGEF1	Q92888
8915	0.20521	BCL10	O95999
6201	0.204388	RPS7	P62081
343413	0.202126	FCRL6	Q6DN72
